# 1 A robust role for motor cortex

2 **Gonçalo Lopes**<sup>1,2\*</sup>    **Joana Nogueira**<sup>1,2</sup>    **George Dimitriadis**<sup>1,2</sup>    **Jorge**  
3 **Aurelio Menendez**<sup>2,3,4</sup>    **Joseph J. Paton**<sup>1</sup>    **Adam R. Kampff**<sup>1,2</sup>

\*For correspondence:

[g.lopes@ucl.ac.uk](mailto:g.lopes@ucl.ac.uk)

4 <sup>1</sup>Champalimaud Neuroscience Programme, Champalimaud Centre for the Unknown,  
5 Portugal; <sup>2</sup>Sainsbury Wellcome Centre for Neural Circuits and Behaviour, University  
6 College London, United Kingdom; <sup>3</sup>Gatsby Computational Neuroscience Unit, University  
7 College London, United Kingdom; <sup>4</sup>Centre for Computation, Mathematics and Physics in  
8 the Life Sciences and Experimental Biology, University College London, United Kingdom

---

10 **Abstract** The role of motor cortex in non-primate mammals remains unclear. More than a  
11 century of stimulation, anatomical and electrophysiological studies has implicated neural activity in  
12 this region with all kinds of movement. However, following the removal of motor cortex, rats retain  
13 most of their adaptive behaviours, including previously learned skilled movements. Here we revisit  
14 these two conflicting views of motor cortex and present a new behaviour assay, challenging  
15 animals to respond to unexpected situations while navigating a dynamic obstacle course.  
16 Surprisingly, rats with motor cortical lesions show clear impairments facing an unexpected collapse  
17 of the obstacles, while showing no impairment with repeated trials in many motor and cognitive  
18 metrics of performance. We propose a new role for motor cortex: extending the robustness of  
19 sub-cortical movement systems, specifically to unexpected situations demanding rapid motor  
20 responses adapted to environmental context. The implications of this idea for current and future  
21 research are discussed.

---

22

## 23 Introduction

24 The involvement of the brain and spinal cord in motor control has been recognized since the  
25 earliest known clinical records of head and spinal injuries, dating back to ancient Egypt (*Louis, 1994*;  
26 *van Middendorp et al., 2010*). However, the mechanism used by the nervous system to generate  
27 movement was not fully appreciated until Galvani first reported his famous experiments on *animal*  
28 *electricity* (*Galvani, 1791*). By isolating the sciatic nerve and gastrocnemius muscle in the frog,  
29 Galvani clearly demonstrated in a series of stimulation experiments that an electrical process, con-  
30 tained entirely within the biology of the frog's leg, was responsible for the spontaneous generation  
31 of muscle contractions. This would lead to the discovery and physiological characterization of the  
32 nerve impulse, the action potential, that travels across the nerve to initiate muscle movement  
33 (*du Bois-Reymond, 1843*; *Bernstein, 1868*; *Schuetze, 1983*). The success of these seminal experi-  
34 ments immediately raised a fundamental question regarding nerve conduction: if spontaneous  
35 muscle contraction is generated by nerve impulses transmitted throughout the nervous system,  
36 how is this transmission coordinated in order to generate the complex patterns of muscle activity  
37 observed in natural behaviour?

## 38 Discovery of the motor cortex

39 In search of answers to this question, researchers next turned to the brain, the seat of anatomical  
40 convergence of the nervous system. Following Galvani's footsteps, several attempts were made to  
41 stimulate the cerebral cortex electrically, but with little success (*Gross, 2007*). It wasn't until the 1870s  
42 that the first indications of a direct involvement of the cortex in the production of movement came  
43 to light, around the time when Hughlings Jackson undertook his studies on epileptic convulsions  
44 (*Jackson, 1870*). He observed that in some patients the fits would start by a deliberate spasm on  
45 one side of the body, and that different body parts would become systematically affected one after  
46 the other. He connected the orderly march of these spasms to the existence of localized lesions in  
47 the *post-mortem* brain of his patients and hypothesized that the origin of these fits was uncontrolled  
48 excitation caused by local changes in cortical grey matter (*Jackson, 1870*). In that same year, Fritsch  
49 and Hitzig published their famous study demonstrating that it is possible to elicit movements by  
50 direct stimulation of the cortex in dogs (*Fritsch and Hitzig, 1870*). Furthermore, stimulation of  
51 different parts of the cortex produced movement in different parts of the body (*Fritsch and Hitzig,*  
52 *1870*). It appeared that the causal mechanism for epileptic convulsions predicted by Hughlings  
53 Jackson had been found, and with it a possible explanation for how the intact brain might control  
54 movement. The cerebral cortex was already considered at the time to be the seat of reasoning  
55 and sensation, so if activity over this so-called *motor cortex* was able to exert direct control over the  
56 musculature of the body, then it might, in the normal brain, be the area that connects volition to  
57 muscles (*Fritsch and Hitzig, 1870*).

## 58 **The Goltz-Ferrier debates**

59 David Ferrier, a Scottish neurologist deeply impressed by the ideas of Hughlings Jackson and by the  
60 positive results of Fritsch and Hitzig's experiments, proceeded to reproduce and expand on their  
61 observations with comprehensive stimulation studies showing how activity in the motor cortex  
62 was sufficient to produce a large variety of movements across a wide range of mammalian species  
63 (*Ferrier, 1873*). Meanwhile, other researchers across Europe such as Goltz and Christiani were  
64 facing a dilemma: in many of the so-called "lower mammals" massive lesions of the cerebral cortex  
65 failed to demonstrate any visible long-term impairments in the motor behaviour of animals (*James,*  
66 *1885; Goltz, 1888*). These two lines of inquiry first clashed at the seventh International Medical  
67 Congress held in London in August 1881, where Goltz of Strassburg and Ferrier of London presented  
68 their results in a series of debates on the localization of function in the cerebral cortex (*Phillips*  
69 *et al., 1984; Tyler and Malessa, 2000*).

70 Goltz assumed a clear anti-localizationist position. He advanced that it was impossible to pro-  
71 duce a complete paresis of any muscle, or complete dysfunction of any perception, by destruction  
72 of any part of the cerebral cortex, and that he found mostly deficits of general intelligence in his  
73 dogs (*Tyler and Malessa, 2000*). Following Goltz's presentation, Ferrier emphasized the danger of  
74 generalizing from the dog to animals of other orders (e.g. man and monkey). He then proceeded  
75 to exhibit his own lesion results by means of antiseptic surgery in the monkey, describing how a  
76 circumscribed unilateral lesion of the motor cortex produced complete contralateral paralysis of the  
77 leg. He also produced a striking series of microscopic sections of Wallerian degeneration (*Waller,*  
78 *1850*) of the "motor path" from the cortex to the contralateral spinal cord, the crossed descending  
79 projections forming the pyramidal corticospinal tract (*Tyler and Malessa, 2000*).

80 The debates concluded with the public demonstration of live specimens: a dog with large  
81 lesions to the parietal and posterior lobes from Goltz; and from Ferrier, a hemiplegic monkey with  
82 a unilateral lesion to the motor cortex of the contralateral side. As predicted, Goltz's dog showed  
83 a clear ability to locomote and avoid obstacles and to make use of its other basic senses, while  
84 displaying peculiar deficits of intelligence such as failing to respond with fear to the cracking of a  
85 whip or ignoring tobacco smoke blown in its face. On the other hand, Ferrier's monkey appeared  
86 severely hemiplegic, in a condition similar to human stroke patients. After the demonstrations, the  
87 animals were killed and their brains removed. Preliminary observations revealed that the lesions  
88 in Goltz's dog were less extensive than expected, particularly on the left hemisphere. Ferrier's  
89 lesions on the other hand were precisely circumscribed to the contralateral motor cortex. These  
90 demonstrations secured the triumph of Ferrier, who went on to firmly establish the localizationist  
91 approach to neurology and the idea of a somatotopic arrangement over the motor cortex.

92 The Goltz-Ferrier debates had far-reaching implications throughout the entire research commu-  
93 nity of the time, and the basic dilemma that was presented has sparked controversy and confusion

94 for over a hundred years since (*Phillips et al., 1984; Lashley, 1924; de Barenne, 1933; Tyler and*  
95 *Malessa, 2000; Gross, 2007*). In the meantime, views of motor cortex have evolved to suggest it  
96 plays a role in “understanding” the movements of others (*Rizzolatti and Craighero, 2004*), imagining  
97 one’s own movements (*Porro et al., 1996*), or in learning new movements (*Kawai et al., 2015*), but  
98 where are we today regarding its role in directly controlling movement?

### 99 **Stimulating motor cortex causes movement; motor cortex is active during mo-** 100 **vement**

101 Motor cortex is still broadly defined as the region of the cerebral hemispheres from which mo-  
102 vements can be evoked by low-current stimulation, following Fritsch and Hitzig’s original experi-  
103 ments in 1870 (*Fritsch and Hitzig, 1870*). Stimulating different parts of the motor cortex elicits  
104 movement in different parts of the body, and systematic stimulation surveys have revealed a  
105 topographical representation of the entire skeletal musculature across the cortical surface (*Ley-*  
106 *ton and Sherrington, 1917; Penfield and Boldrey, 1937; Neafsey et al., 1986*). Electrophysiological  
107 recordings in motor cortex have routinely found correlations between neural activity and many  
108 different movement parameters, such as muscle force (*Evarts, 1968*), movement direction (*Georgo-*  
109 *poulos et al., 1986*), speed (*Schwartz, 1993*), or even anisotropic limb mechanics (*Scott et al., 2001*)  
110 at the level of both single neurons (*Evarts, 1968; Churchland and Shenoy, 2007*) and populations  
111 (*Georgopoulos et al., 1986; Churchland et al., 2012*). Determining what exactly this activity in motor  
112 cortex controls (*Todorov, 2000*) has been further complicated by studies using long stimulation  
113 durations in which continuous stimulation at a single location in motor cortex evokes complex,  
114 multi-muscle movements (*Graziano et al., 2002; Aflalo and Graziano, 2006*). However, as a whole,  
115 these observations all support the long standing view that activity in motor cortex is involved in the  
116 direct control of movement.

### 117 **Motor cortex lesions produce different deficits in different species**

118 What types of movement require motor cortex? In humans, a motor cortical lesion is devastating.  
119 Permanent injury to the frontal lobes of the brain by stroke or mechanical means is often followed  
120 by weakness or paralysis of the limbs in the side of the body opposite to the lesion (*Louis, 1994*).  
121 Although the paretic symptoms have a tendency to recover partially, especially with training and  
122 rehabilitation, permanent movement deficits and loss of muscle control in the affected limbs is  
123 the common prognosis; movement is permanently and obviously impaired (*Laplaine et al., 1977;*  
124 *Kwakkel et al., 2003*). In non-human primates, similar gross movement deficits are observed after  
125 lesions, albeit transiently (*Leyton and Sherrington, 1917; Travis, 1955*). The longest lasting effect of a  
126 motor cortical lesion is the decreased motility of distal forelimbs, especially the control of individual  
127 finger movements required for precision skills (*Leyton and Sherrington, 1917; Darling et al., 2011*).  
128 But equally impressive is the extent to which other movements fully recover, including the ability to



129 sit, stand, walk, climb and even reach to grasp, as long as precise finger movements are not required  
130 (*Leyton and Sherrington, 1917; Darling et al., 2011; Zaaimi et al., 2012*). In non-primate mammals,  
131 the *absence* of lasting deficits following motor cortical lesion is even more striking. Careful studies  
132 of skilled reaching in rats have revealed an impairment in paw grasping behaviours (*Whishaw et al.,*  
133 *1991; Alaverdashvili and Whishaw, 2008*), comparable to the long lasting deficits seen in primates,  
134 but this is a limited impairment when compared to the range of movements that are preserved  
135 (*Whishaw et al., 1991; Kawai et al., 2015*). In fact, even after complete decortication, rats, cats and  
136 dogs retain a shocking amount of their movement repertoire (*Goltz, 1888; Bjursten et al., 1976;*  
137 *Terry et al., 1989*). If we are to accept the simple hypothesis that motor cortex is the structure  
138 responsible for “voluntary movement production”, then why is there such a blatant difference in  
139 the severity of deficits caused by motor cortical lesions in humans versus other mammals? With  
140 over a century of stimulation and electrophysiology studies clearly suggesting that motor cortex is  
141 involved in many types of movement, in all mammalian species, how can these divergent results be  
142 reconciled?

### 143 **The role of the corticospinal tract**

144 It must have felt uncanny to those early researchers to find that surface stimulation of the cortex  
145 produces discrete muscle responses, in a way so similar to what Galvani did with the frog’s leg.  
146 Indeed, Sherrington himself conveys the feeling clearly in the opening of his seminal lecture on  
147 the motor cortex (*Sherrington, 1906*, p.271), confessing “that although it is not surprising that such  
148 territorial subdivision of function should exist in the cerebral cortex, it is surprising that by our  
149 relatively imperfect artifices for stimulation we should be able to obtain clear evidence thereof.”

150 Of course, it did not go unnoticed that this fact might be due to the massive projection from  
151 cortex to the spinal cord, which had been fully traced by Ludwig Türck only twenty years before  
152 Fritsch and Hitzig’s experiment (*Nathan and Smith, 1955*). This corticospinal tract was found to  
153 originate in the anterior regions of the cerebral cortex and terminate directly in the lateral columns  
154 of the spinal cord after decussating (i.e. crossing over) at the level of the brainstem’s *medulla*  
155 *oblongata*. The existence of this corticospinal pathway presented compelling anatomical evidence  
156 of the means by which the motor cortex might be able to exert a direct influence on movement by  
157 electrical conduction of nerve impulses, but the role of this connection remained elusive.

### 158 **The effects of lesions in the corticospinal tract**

159 In the wake of the Goltz-Ferrier debates, investigations of the role of the direct corticospinal  
160 descending pathway were conducted in multiple animal species. Sherrington himself started  
161 out his work by tracing spinal cord degeneration over large periods of time (up to 11 months)  
162 following cortical lesions in Goltz’s dogs (*Langley and Sherrington, 1884; Sherrington, 1885*). He  
163 confirmed that many of the properties of the corticospinal tract in the primate held for the dog,

164 and furthermore became one of the first to observe the presence of a degenerated “re-crossed”  
165 pyramidal tract that travels down the cord ipsilateral to the side of the lesion (*Sherrington, 1885*).  
166 These fibers would later come to be called the ipsilateral, ventral corticospinal tract, and have  
167 since been found and described in most mammalian species as forming roughly 10% of the  
168 entire corticospinal projections (*Kuypers, 1981; Brösamle and Schwab, 2000; Lacroix et al., 2004*).  
169 However, he also had the chance during this time to observe first hand the negative effects of  
170 corticospinal degeneration following lesion, which had been previously reported by Goltz and others  
171 in a variety of non-primate specimens. In his own words:

172       That the pyramidal tracts are in the dog requisite for volitional impulses to reach limbs  
173       and body seems negated by the fact that the animal can run, leap, turn to either  
174       side, use neck and jaws, &c. with ease and success after nearly, if not wholly, complete  
175       degeneration of these tracts on both sides. Further, after complete degeneration of one  
176       pyramid, there is in the dog no obvious difference between the movements of the right  
177       and left sides. ((*Sherrington, 1885*, p.189))

178       Interestingly, he does note that “defect of motion is observable only as a clumsiness in execution  
179       of fine movements” (*Sherrington, 1885*). These observations once again stood out in stark contrast  
180       with lesion experiments reported by Ferrier in the monkey, where cauterization of specific motor  
181       cortical areas produced complete and persistent paralysis of the corresponding body parts (*Ferrier  
182       and Yeo, 1884*).

183       Years later, Sherrington would come back to the motor cortex with a new set of studies on  
184       stimulation and ablation of the precentral region (*Grünbaum and Sherrington, 1903; Graham Brown  
185       and Sherrington, 1913; Leyton and Sherrington, 1917*). In these studies together with Grünbaum,  
186       Sherrington targeted motor cortical lesions to the excitable area of the arm or the leg and tracked  
187       the recovery of the animals over time. Following the initial paresis and loss of muscle control  
188       they observed dramatic recovery of most skilled motor acts, such as peeling open a banana or  
189       climbing cages (*Leyton and Sherrington, 1917*). In order to test whether the recovery process was  
190       due to cortical reorganization, they systematically stimulated the areas adjacent to the lesion as  
191       well as the motor cortex of the opposite hemisphere, but failed to evoke movements in the affected  
192       limb (*Leyton and Sherrington, 1917*), as would be expected if commands were traveling down the  
193       corticospinal tract in spared regions. Furthermore, subsequent ablation of those areas failed to  
194       produce any new impairments in the recovered limb, leaving Sherrington and his colleagues at a  
195       loss to find the locus of recovery (*Leyton and Sherrington, 1917*).

196       Confused by these results, which they thought “caused concern to, students of cerebral phy-  
197       siology”, Glee and Cole introduced a set of more quantitative behavioural assays in the hope of  
198       tracking in detail the recovery of motor control (*Glees and Cole, 1950; Cole, 1952*). They studied  
199       the behaviour of monkeys solving various puzzle boxes following successive circumscribed lesions

200 to the thumb, index and arm areas of the motor cortex. As Sherrington reported, there was a  
201 quick recovery after an initial period of paralysis and loss of motor control. However, even though  
202 the monkeys fully recovered their ability to skillfully open the puzzle box, some subtle movement  
203 deficits and paresis in the control of fine movements of the digits was reported to persist (*Glees*  
204 *and Cole, 1950*). When stimulating motor cortical areas surrounding the circumscribed lesions,  
205 they were able to evoke movements in the impacted digits and reinstate the paretic symptoms  
206 after further ablation (*Glees and Cole, 1950*). This suggested the hypothesis that surrounding areas  
207 of the motor cortex could undergo reorganization following the lesion. However, an important  
208 difference to emphasize between these experiments and those of Sherrington is the fact that  
209 only relatively circumscribed motor cortical regions were removed in each surgery, whereas in the  
210 original Sherrington study the entire elbow, wrist, index, thumb and remaining digit motor areas  
211 were excised at once (*Leyton and Sherrington, 1917*), most likely causing degeneration of the entire  
212 corticospinal pathway for the affected limb. The presence of an intact corticospinal tract, excitability  
213 of movements to low-current stimulation and transient paretic symptoms following ablation thus  
214 seem to go hand in hand.

215 In the hopes of clarifying the confusion of exactly which movements were controlled by cortex,  
216 other studies focused on lesions restricted to the corticospinal tract, using both unilateral and bila-  
217 teral section at the level of the medullary pyramids (*Tower, 1940; Lawrence and Kuypers, 1968a,b*).  
218 The goal was to isolate the effects of all the individual descending pathways to the spinal cord  
219 and resolve once and for all the question of whether the corticospinal tract of the motor cortex  
220 was the source of all “voluntary” movements. Sarah Tower was the first to describe in detail the  
221 results of unilateral and bilateral pyramidotomy in primates, with and without lesion of the motor  
222 cortex (*Tower, 1940*). She summarized the condition as “hypotonic paresis”, characterized by a loss  
223 of skeletal muscle tone and depression of the vasomotor system, along with general weakening  
224 of the reflexes involving the affected limb segments. Although all discrete usage of the hand and  
225 digits was eliminated, she did emphasize the clear presence of voluntary movements in the various  
226 purposeful compensations produced by the animals to deal with the affliction. Tower attributed  
227 these compensations to the preserved capacities of brainstem circuits.

228 A more definitive study to dissociate the effects of direct corticospinal and indirect brainstem  
229 descending pathways was conducted by Lawrence and Kuypers, and presented in their now classical  
230 publications (*Lawrence and Kuypers, 1968a,b*). Using the Klüver board, a task where monkeys have  
231 to pick morsels of food from differently sized round holes, they observed that while normal monkeys  
232 routinely pick up the food by pinching individual bits with their fingers, monkeys with bilateral  
233 corticospinal lesions were mostly unable to perform this precise pincer movement, and instead  
234 employed coarser compensatory clasping strategies to retrieve the food (*Lawrence and Kuypers,*  
235 *1968a*). In addition, lesioned monkeys were consistently reported to be somewhat slower and less  
236 agile than normal animals. However, most of their overall movement repertoire was surprisingly

237 preserved. Their final conclusions fit remarkably well with the initial observations of Sherrington in  
238 the dog, suggesting that the corticospinal pathways superimpose speed and agility on subcortical  
239 mechanisms, and provide the capacity for fractionation of movements such as independent finger  
240 movements (*Lawrence and Kuypers, 1968a*). These observations recapitulate the effects of motor  
241 cortical lesions reported by Sherrington, but remain at odds with the primary role assigned to  
242 motor cortex, and the direct corticospinal tract, with the control of all voluntary movements.

### 243 **There are anatomical differences in corticospinal projections between primates** 244 **and other mammals**

245 In primates, the conspicuous effects of motor cortical lesion can also be induced by sectioning  
246 the corticospinal tract, the direct monosynaptic projection that connects motor cortex, and other  
247 cortical regions, to the spinal cord (*Tower, 1940; Lawrence and Kuypers, 1968a*). In monkeys, and  
248 similarly in humans, this pathway has been found to directly terminate on spinal motor neurons  
249 responsible for the control of distal muscles (*Leyton and Sherrington, 1917; Bernhard and Bohm,*  
250 *1954*) and is also thought to support the low-current movement responses evoked by electrical  
251 stimulation of the cortex, as evidenced by the increased difficulty in obtaining a stimulation response  
252 following section at the level of the medulla (*Woolsey et al., 1972*).

253 However, the corticospinal tract is by no means the only pathway from cortex to movement  
254 (Figure 1). Motor cortex targets many other brain regions that can themselves generate movement.  
255 In fact, this specialized connection from telencephalon to spinal cord appeared only recently in  
256 vertebrate evolution (*ten Donkelaar, 2009*), and was further elaborated to include a direct con-  
257 nection from cortex to motor neurons only in some primate species and other highly manipulative  
258 mammals such as raccoons (*Heffner and Masterton, 1983*). In all other mammals, including cats  
259 and rats, the termination pattern of the corticospinal tract largely avoids the motor neuron pools in  
260 ventral spinal cord and concentrates instead on intermediate zone interneurons and dorsal sensory  
261 neurons (*Kuypers, 1981; Yang and Lemon, 2003*). Why then is there such a large dependency on this  
262 tract for human motor control? One possibility is that the rubrospinal tract—a descending pathway  
263 originating in the brainstem and terminating in the intermediate zone—is degenerated in humans  
264 compared to other primates and mammals (*Nathan and Smith, 1955, 1982*), and is thought to play  
265 a role in compensating for the loss of the corticospinal tract in non-human species (*Lawrence and*  
266 *Kuypers, 1968b; Zaaimi et al., 2012*).

267 It thus seems likely that most mammals rely on “indirect” pathways to convey cortical motor  
268 commands to muscles. These differences in anatomy might explain the lack of conspicuous, lasting  
269 movement deficits following motor cortical lesion in non-primates, but leaves behind a significant  
270 question: what is the motor cortex actually controlling in all these other mammals?

## 271 **What is the role of motor cortex in non-primate mammals?**

272 In the rat, a large portion of cortex is considered “motor” based on anatomical (*Donoghue and*  
273 *Wise, 1982*), stimulation (*Donoghue and Wise, 1982; Neafsey et al., 1986*) and electrophysiological  
274 evidence (*Hyland, 1998*). However, the most consistently observed long-term motor control deficit  
275 following motor cortical lesion has been an impairment in supination of the wrist and individuation  
276 of digits during grasping, which in turn impairs reaching for food pellets through a narrow vertical slit  
277 (*Whishaw et al., 1991; Alaverdashvili and Whishaw, 2008*). Despite the fact that activity in rodent  
278 motor cortex has been correlated with movements in every part of the body (not just distal limbs)  
279 (*Hill et al., 2011; Erlich et al., 2011*), it would appear we are led to conclude that this large high-level  
280 motor structure, with dense efferent projections to motor areas in the spinal cord (*Kuypers, 1981*),  
281 basal ganglia (*Turner and DeLong, 2000; Wu et al., 2009*), thalamus (*Lee et al., 2008*), cerebellum  
282 (*Baker et al., 2001*) and brainstem (*Jarratt and Hyland, 1999*), as well as to most primary sensory  
283 areas (*Petreanu et al., 2012; Schneider et al., 2014*), evolved simply to facilitate more precise wrist  
284 rotations and grasping gestures. Maybe we are missing something. Might there be other problems  
285 in movement control that motor cortex is solving, but that we may be overlooking with our current  
286 assays?

## 287 **A role in modulating the movements generated by lower motor centres**

288 The idea that the descending cortical pathways superimpose speed and precision on an existing  
289 baseline of behaviour has been suggested by lesion work in the primate (*Lawrence and Kuypers,*  
290 *1968b*), but has been investigated much more thoroughly in the context of studies on the neural  
291 control of locomotion in cats. These studies have suggested that the corticospinal tract can play  
292 a role in the *adjustment* of ongoing movements, modulating the activity and sensory feedback in  
293 spinal circuits in order to adapt a lower movement controller to challenging conditions.

294 It has been known for more than a century that completely decerebrate cats are capable of  
295 sustaining the locomotor rhythms necessary for walking on a flat treadmill utilizing only spinal  
296 circuits (*Graham Brown, 1911*). In addition, there is a general capacity for spinal circuits to modulate  
297 network activity with incoming sensory input in order to coordinate and switch between different  
298 responses, even during specific phases of movement (*Forsberg et al., 1975*). Brainstem and mid-  
299 brain circuits are sufficient to initiate the activity of these spinal central pattern generators (*Grillner*  
300 *and Shik, 1973*), so what exactly is the contribution of motor cortex to the control of locomotion?  
301 Single-unit recordings of pyramidal tract neurons (PTNs) from cats walking on a treadmill have  
302 shown that a large proportion of these neurons are locked to the step cycle (*Armstrong and Drew,*  
303 *1984*). However, we know from the decerebrate studies that this activity is not necessary for the  
304 basic locomotor pattern. What then is its role?

305 Lesions of the lateral descending pathways (containing corticospinal and rubrospinal projections)  
306 produce a long term impairment in the ability of cats to step over obstacles (*Drew et al., 2002*).

307 Recordings of PTN neurons during locomotion show increased activity during these visually guided  
308 modifications to the basic step cycle (*Drew et al., 1996*). These observations suggest that motor  
309 cortex neurons are necessary for precise stepping and adjustment of ongoing locomotion to  
310 changing conditions. However, long-term effects seem to require complete lesion of *both* the  
311 corticospinal and rubrospinal tracts (*Drew et al., 2002*). Even in these animals, the voluntary act of  
312 stepping over an obstacle does not disappear entirely, and moreover, they can adapt to changes in  
313 the height of the obstacles (*Drew et al., 2002*). Although they never regain the ability to gracefully  
314 clear an obstacle, these animals still adjust their stepping height when faced with a higher obstacle  
315 in such a way that would have allowed them to comfortably clear the lower obstacle (*Drew et al.,*  
316 *2002*). Furthermore, deficits caused by lesions restricted to the pyramidal tract seem to disappear  
317 over time (*Liddell and Phillips, 1944*), and are most clearly visible only the first time an animal  
318 encounters a new obstacle (*Liddell and Phillips, 1944*).

319 The view that motor cortex in non-primate mammals is principally responsible for adjusting on-  
320 going movement patterns generated by lower brain structures is appealing. What is this modulation  
321 good for? What does it allow an animal to achieve? How can we assay its necessity?

### 322 **Towards a new teleology; new experiments required**

323 It should now be clear that the involvement of motor cortex in the direct control of all “voluntary  
324 movement” is human-specific. There is a role for motor cortex across mammals in the control  
325 of precise movements of the extremities, especially those requiring individual movements of the  
326 fingers, but these effects are subtle in non-primate mammals. Furthermore, what would be a  
327 devastating impairment for humans may not be so severe for mammals that do not depend on  
328 precision finger movements for survival. Therefore, generalizing this specific role of motor cortex  
329 from humans to all other mammals would be misleading. We could be missing another, more  
330 primordial role for this structure that predominates in other mammals, and by doing so, we may  
331 also be missing an important role in humans.

332 The proposal that motor cortex induces modifications of ongoing movement synergies, prompted  
333 by the electrophysiological studies of cat locomotion, definitely points to a role consistent with  
334 the results of various lesion studies. However, in assays used thus far, the ability to modify ongoing  
335 movement generally recovers after a motor cortical lesion. What are the environmental situations  
336 in which motor cortical modulation is most useful?

337 Cortex has long been proposed to be the structure responsible for integrating a representation  
338 of the world and improving the predictive power of this representation with experience (*Barlow,*  
339 *1985; Doya, 1999*). If motor cortex is the means by which these representations can gain influence  
340 over the body, however subtle and “modulatory”, can we find situations (i.e. tasks) in which this  
341 cortical control is required?

342 The necessity of cortex for various behavioural tasks has been actively investigated in experimen-

343 tal psychology for over a century, including the foundational work of Karl Lashley and his students  
344 (*Lashley, 1921, 1950*). In the rat, large cortical lesions were found to produce little to no impairment  
345 in movement control, and even deficits in learning and decision making abilities were difficult to  
346 demonstrate consistently over repeated trials. However, Lashley did notice some evidence that  
347 cortical control may be involved in postural adaptations to unexpected perturbations (*Lashley,*  
348 *1921*). These studies once again seem to recapitulate the two most consistent observations found  
349 across the entire motor cortical lesion literature in non-primate mammals since Hitzig (*Fritsch and*  
350 *Hitzig, 1870*), Goltz (*Goltz, 1888*), Sherrington (*Sherrington, 1885*) and others (*Oakley, 1979; Terry*  
351 *et al., 1989*). One, direct voluntary control over movement is most definitely not abolished through  
352 lesion; and two, certain aspects of some movements are definitely impaired, but only under certain  
353 challenging situations. The latter are often reported only anecdotally. It was this collection of  
354 intriguing observations in animals with motor cortical lesions that prompted us to expand the scope  
355 of standard laboratory tasks to include a broader range of motor control challenges that brains  
356 encounter in their natural environments.

### 357 **Experiment Introduction**

358 In the natural world, an animal must be able to adapt locomotion to any surface, not only in  
359 anticipation of upcoming terrain, but also in response to the unexpected perturbations that often  
360 occur during movement. This allows animals to move robustly through the world, even when  
361 navigating a changing environment. Testing the ability of the motor system to generate a robust  
362 response to an unexpected change can be difficult as it requires introducing a perturbation without  
363 cueing the animal about the altered state of the world. Marple-Horvat and colleagues built a  
364 circular ladder assay for cats that was specifically designed to record from motor cortex during such  
365 conditions (*Marple-Horvat et al., 1993*). One of the modifications they introduced was to make one  
366 of the rungs of the ladder fall unexpectedly under the weight of the animal. When they recorded  
367 from motor cortical neurons during the rung drop, they noticed a marked increase in activity, well  
368 above the recorded baseline from normal stepping, as the animal recovered from the fall and  
369 resumed walking. However, whether this increased activity of motor cortex was necessary for the  
370 recovery response has never been assayed.



372

### Box 1. Some cautionary remarks on lesion techniques

373

374

375

376

377

378

379

380

381

382

383

384

385

386

387

388

389

390

391

392

393

394

395

396

397

398

399

400

401

402

403

The original methods used to induce a permanent lesion to the motor cortex were very crude, often involving gross mechanical aggression to the neural tissue by using surgical knife cuts or ablation by water-jet, aspiration, and thermo- or electrocoagulation. These methods are still widely used in lesion studies for their simplicity and bluntness, but have the disadvantage of making it hard to limit the lesion to a single area because of possible damage to subcortical areas or the destruction of fibers of passage. These limitations made it more difficult to interpret the effects of cortical lesions, and eventually led to the development of new techniques designed to work around such problems. Chemical injections of neurotoxic compounds such as ibotenic acid or kainic acid aim to increase selectivity of the lesion by limiting damage to neural cell bodies in the target area while leaving the fibers of passage intact (*Schwarcz et al., 1979*). Photothrombosis (*Watson et al., 1985*) or devascularization by pial stripping (*Meyer and Meyer, 1971*) aim to reproduce the effects of clinical stroke while avoiding extension of the lesion to subcortical areas as much as possible.

The early studies of Broca localizing the function of articulate language to a specific region in the cerebral hemispheres (*Broca, 1861*) established a long tradition of correlating the location of surgical brain injury with detailed analysis of any subsequent behavioural deficits. This method is not without its difficulties. The problems of plasticity and diaschisis will forever complicate conclusions based on injury and manipulation of nervous tissue (*Lashley, 1933*). Many recent methods for reversible chemical or optogenetic inactivation of the cortex have been proposed to improve statistical power of behavioural assessments (*DeFeudis, 1980; Dong et al., 2010; Guo et al., 2015*). Unfortunately, given that the cortex maintains a tight balance of excitation and inhibition during normal functioning and is also densely interconnected with the rest of the brain, the effects of such transient manipulations are prone to cause multiple downstream effects that can confound inferences about behavioural relevance (*Otchy et al., 2015*). In this respect, they are similar to stimulation experiments in that they are very useful in determining that two areas are connected in a circuit, but not necessarily what the connection means. Of course, permanent lesions themselves can induce plasticity changes in the function of downstream and upstream circuits. The expectation, however, is that such changes represent a homeostatically stable state of the system, allowing simultaneous investigation of the limits of recovery, as well as the kinds of problems for which a fully intact structure is definitely required.

## 404 Results

405 To investigate whether the intact motor cortex is required for the robust control of movement in  
406 response to unexpected perturbations, we designed a reconfigurable dynamic obstacle course  
407 where individual steps can be made stable or unstable on a trial-by-trial basis (Figure 2, also see  
408 Methods). In this assay, rats shuttle back and forth across the obstacles, in the dark, in order to  
409 collect water rewards. We specifically designed the assay such that modifications to the physics of  
410 the obstacles could be made covertly. In this way, the animal has no explicit information about the  
411 state of the steps until it actually contacts them. Water deprived animals were trained daily for 4  
412 weeks, throughout which they encountered increasingly challenging states of the obstacle course.  
413 Our goal was to characterize precisely the conditions under which motor cortex becomes necessary  
414 for the control of movement, and this motivated us to introduce an environment with graded levels  
415 of uncertainty.

416 We compared the performance of 22 animals: 11 with bilateral ibotenic acid lesions to the  
417 primary and secondary forelimb motor cortex, and 11 age and gender matched controls (5 sham  
418 surgery, 6 wild-types). Animals were given ample time to recover, 4 weeks post-surgery, in order to  
419 specifically isolate behaviours that are chronically impaired in animals lacking the functions enabled  
420 by motor cortical structures. Histological examination of serial coronal sections revealed significant  
421 variability in the extent of damaged areas (Figure 3), which was likely caused by mechanical blockage  
422 of the injection pipette during lesion induction at some sites. Nevertheless, volume reconstruction  
423 of the serial sections allowed us to accurately quantify the size of each lesion, identify each ani-  
424 mal (from Lesion A to Lesion K; largest to smallest), and use these values to compare observed  
425 behavioural effects as a function of lesion size.

426 During the first sessions in the “stable” environment, all animals, both lesions and controls,  
427 quickly learned to shuttle across the obstacles, achieving stable, skilled performance after a few  
428 days of training (Figure 4). Even though the distance between steps was fixed for all animals,  
429 the time taken to adapt the crossing strategy was similar irrespective of body size. When first  
430 encountering the obstacles, animals adopted a cautious gait, investigating the location of the  
431 subsequent obstacle with their whiskers, stepping with the leading forepaw followed by a step  
432 to the same position with the trailing paw (Video 1: “First Leftwards Crossing”). However, over  
433 the course of only a few trials, all animals exhibited a new strategy of “stepping over” the planted  
434 forepaw to the next obstacle, suggesting an increased confidence in their movement strategy in  
435 this novel environment (Video 1: “Second Leftwards Crossing”). This more confident gait developed  
436 into a coordinated locomotion sequence after a few additional training sessions (Video 1: “Later  
437 Crossing”). The development of the ability to move confidently and quickly over the obstacle course  
438 was observed in both lesion and control animals (Video 2).

439 In addition to the excitotoxic lesions, in three animals we performed larger frontal cortex

440 aspiration lesions in order to determine whether the remaining trunk and hindlimb representations  
441 were necessary to navigate the elevated obstacle course. Also, in order to exclude the involvement  
442 of other corticospinal projecting regions in the parietal and rostral visual areas (*Miller, 1987*), we  
443 included three additional animals which underwent even more extensive cortical lesion procedures  
444 (Figure 5A,B, see Methods). These *extended* lesion animals were identified following chronological  
445 order (from Extended Lesion A to Extended Lesion F; where the first three animals correspond to  
446 frontal cortex aspiration lesions and the remaining animals to the more extensive frontoparietal  
447 lesions). In these extended cortical lesions, recovery was found to be overall slower than in lesions  
448 limited to the motor cortex, and animals required isolation and more extensive care during the  
449 recovery period.

450 Nevertheless, when tested in the shuttling assay, the basic performance of these extended  
451 lesion animals was similar to that of controls and animals with excitotoxic motor cortical lesions  
452 (Figure 5C). Animals with large frontoparietal lesions did exhibit a very noticeable deficit in paw  
453 placement throughout the early sessions (Figure 5D). Interestingly, detailed analysis of paw place-  
454 ment behaviour revealed that this deficit was almost entirely explained by impaired control of the  
455 hindlimbs. Paw slips were much more frequent when stepping with a hindlimb than with a forelimb  
456 (Figure 5E,F). In addition, when a slip did occur, these animals failed to adjust the affected paw to  
457 compensate for the fall (e.g. keeping their digits closed), which significantly impacted their overall  
458 posture recovery. These deficits in paw placement are consistent with results from sectioning the  
459 entire pyramidal tract in cats (*Liddell and Phillips, 1944*), and reports in ladder walking following  
460 motor cortical lesion in rodents (*Metz and Whishaw, 2002*), but surprisingly we did not observe  
461 deficits in paw placement in animals with ibotenic acid lesions limited to forelimb motor cortex  
462 (Figure 5D). Furthermore, despite this initial impairment, animals with extended lesions were still  
463 able to improve their motor control strategy up to the point where they were moving across the  
464 obstacles as efficiently as controls and other lesioned animals (Figure 5C, Video 2). Indeed, in the  
465 largest frontoparietal lesion, which extended all the way to rostral visual cortex, recovery of a stable  
466 locomotion pattern was evident over the course of just ten repeated trials (Video 3). The ability of  
467 this animal to improve its motor control strategy in such a short period of time seems to indicate  
468 the presence of motor learning, not simply an increase in confidence with the new environment.

469 In subsequent training sessions we progressively increased the difficulty of the obstacle course,  
470 by making more steps unstable. The goal was to compare the performance of the two groups as  
471 a function of difficulty. Surprisingly, both lesion and control animals were able to improve their  
472 performance by the end of each training stage even for the most extreme condition where all  
473 steps were unstable (Figure 4, Video 4). This seems to indicate that the ability of these animals to  
474 fine-tune their motor performance in a challenging environment remained intact.

475 One noticeable exception was the animal with the largest ibotenic acid lesion. This animal,  
476 following exposure to the first unstable protocol, was unable to bring itself to cross the obstacle

477 course (Video 5). Some other control and lesioned animals also experienced a similar form of  
478 distress following exposure to the unstable obstacles, but eventually all these animals managed to  
479 start crossing over the course of a single session. In order to test whether this was due to some  
480 kind of motor disability, we lowered the difficulty of the protocol for this one animal until it was able  
481 to cross again. Following a random permutation protocol, where any two single steps were released  
482 randomly, this animal was then able to cross a single released obstacle placed in any location of the  
483 assay. After this success, it eventually learned to cross the highest difficulty level in the assay in  
484 about the same time as all the other animals, suggesting that there was indeed no lasting motor  
485 execution or learning deficit, and that the disability must have been due to some other unknown,  
486 yet intriguing, (cognitive) factor.

487 Having established that the overall motor performance of these animals was similar across all  
488 conditions, we next asked whether there was any difference in the strategy used by the two groups  
489 of animals to cross the unstable obstacles. We noticed that during the first week of training, the  
490 posture of the animals when stepping on the obstacles changed significantly over time (Figure  
491 6B,C). Specifically, the centre of gravity of the body was shifted further forward and higher during  
492 later sessions, in a manner proportional to performance. However, after the obstacles changed to  
493 the unstable state, we observed an immediate and persistent adjustment of this crossing posture,  
494 with animals assuming a lower centre of gravity and reducing their speed as they approached the  
495 unstable obstacles (Figure 6C,D). Interestingly, we also noticed that a group of animals adopted  
496 a different strategy. Instead of lowering their centre of gravity, they either kept it unchanged or  
497 shifted it even more forward and performed a jump over the unstable obstacles (Figure 7A,B). These  
498 two strategies were remarkably consistent across the two groups, but there was no correlation  
499 between the strategy used and the degree of motor cortical lesion (Figure 6E,F, 7C). In fact, we found  
500 that the use of a jumping strategy was best predicted by the body weight of the animal (Figure 7C).

501 During the two days where the stable state of the environment was reinstated, the posture of  
502 the animals was gradually restored to pre-manipulation levels (Figure 6B,C), although in many cases  
503 this adjustment happened at a slower rate than the transition from stable to unstable. Again, this  
504 postural adaptation was independent of the presence or absence of forepaw motor cortex.

505 We next looked in detail at the days where the state of the obstacle course was randomized  
506 on a trial-by-trial basis. This stage of the protocol is particularly interesting as it reflects a situation  
507 where the environment has a persistent degree of uncertainty. For this analysis, we were forced to  
508 exclude the animals that employed a jumping strategy, as their experience with the manipulated  
509 obstacles was the same irrespective of the state of the world. First, we repeated the same posture  
510 analysis comparing all the stable and unstable trials in the random protocol in order to control  
511 for whether there was any subtle cue in our motorized setup that the animals might be using to  
512 gain information about the current state of the world. There was no significant difference between  
513 randomly presented stable and unstable trials on the approach posture of the animal (Figure

514 8A). However, classifying the trials on the basis of past trial history revealed a significant effect  
515 on posture (Figure 8B). This suggested that the animals were adjusting their body posture when  
516 stepping on the affected obstacles on the basis of their current expectation about the state of the  
517 world, which is updated by the previously experienced state. Surprisingly, this effect again did not  
518 depend on the presence or absence of frontal motor cortical structures (Figure 8C,D).

519 Finally, we decided to test whether general motor performance was affected by the randomized  
520 state of the obstacles. If the animals do not know what state the world will be in, then there will  
521 be an increased challenge to their stability when they cross over the unstable obstacles, possibly  
522 demanding a quick change in strategy when they learn whether the world is stable or unstable. In  
523 order to evaluate the dynamics of crossing, we compared the speed profile of each animal across  
524 these different conditions (Figure 9, see Methods). Interestingly, two of the animals with the largest  
525 lesions appeared to be significantly slowed down on unstable trials, while controls and the animals  
526 with the smallest lesions instead tended to accelerate after encountering an unstable obstacle.  
527 However, the overall effect for lesions versus controls was not statistically significant (Figure 9C).

528 Nevertheless, we were intrigued by this observation and decided to investigate, in detail, the first  
529 moment in the assay when a perturbation is encountered. In the random protocol, even though  
530 the state of the world is unpredictable, the animals know that the obstacles might become unstable.  
531 However, the very first time the environment becomes unstable, the collapse of the obstacles is  
532 completely unexpected and demands an entirely novel motor response.

533 A detailed analysis of the responses to the first collapse of the steps revealed a striking difference  
534 in the strategies deployed by the lesion and control animals. Upon the first encounter with the  
535 manipulated steps, we observed three types of behavioural responses from the animals (Video 6):  
536 investigation, in which the animals immediately stop their progression and orient towards, whisk,  
537 and physically manipulate the altered obstacle; compensation, in which the animals rapidly adjust  
538 their behaviour to negotiate the unexpected instability; and halting, in which the ongoing motor  
539 program ceases and the animals' behaviour simply comes to a stop for several seconds. Remarkably,  
540 these responses depended on the presence or absence of motor cortex (Figure 10). Animals with  
541 the largest motor cortical lesions, upon their first encounter with the novel environmental obstacle,  
542 halted for several seconds, whereas animals with an intact motor cortex, and those with the smallest  
543 lesions, were able to rapidly react with either an investigatory or compensatory response (Video  
544 7,8).

545 The response of animals with extended lesions was even more striking. In two of these animals,  
546 there was a failure to recognize that a change had occurred at all (Video 9). Instead, they kept  
547 walking across the now unstable steps for several trials, never stopping to assess the new situation.  
548 One of them gradually noticed the manipulation and stopped his progression, while the other one  
549 only fully realized the change after inadvertently hitting the steps with its snout (Video 9: Extended  
550 Lesion A). This was the first time we ever observed this behaviour, as all animals with or without

551 cortical lesions always displayed a clear switch in behavioural state following the first encounter  
552 with the manipulation. In the remaining animals with extended lesions, two of them clearly halted  
553 their progression following the collapse of the obstacles, in a way similar to the large motor cortex  
554 ibotenic lesions (Video 10). The third animal (Extended Lesion B) actually collapsed upon contact  
555 with the manipulated step, falling over its paw and digits awkwardly and hitting the obstacles with  
556 its snout. Shortly after this there was a switch to an exploratory behaviour state, in a way similar to  
557 Extended Lesion A.

558 In order to investigate the neurophysiological correlates of these robust responses in the  
559 motor cortex, in three animals we implanted flexible surface electrode grids above the dura in one  
560 hemisphere of the intact brain (Figure 11A, also see Methods). Each step of the obstacle course  
561 was outfitted with a load cell sensor to measure the precise timing of contact and the amount of  
562 weight placed on each limb during locomotion. The entire electrocorticography (ECoG) system  
563 was synchronized on a frame-by-frame basis with the high-speed video acquisition so we could  
564 reconstruct the detailed behaviour of the animal at any point of the physiological trace as well as  
565 relate the continuous load profile on individual steps with different phases in the locomotion cycle.

566 We first asked whether there were responses in the ECoG signal over forelimb motor cortex that  
567 were modulated by stepping behaviour. Aligning the ECoG traces to the event of stepping on a  
568 permanently stable step with the contralateral paw revealed the distinct presence of an evoked  
569 potential on the anterior grid channels that was absent when stepping with the ipsilateral paw  
570 (Figure 11B, top trace). On close inspection, it could be seen that the beginning of the negative  
571 deflection slightly precedes the time of contact with the step, suggesting a non-sensory contribution  
572 to the evoked response. Synaptic activity in the long and thick apical dendrites of pyramidal cells  
573 are thought to be one of the main contributors to cortically recorded extracellular field potentials  
574 (*Buzsáki et al., 2012*). In the cat, a sizeable proportion of pyramidal tract neurons in the motor  
575 cortex have been found to discharge rhythmically during unimpeded locomotion (*Armstrong and  
576 Drew, 1984; Drew et al., 1996*), a phenomenon that is very likely to be coupled with observable  
577 synaptic activity in the potential traces and could account for the step-aligned evoked responses  
578 that we observed during locomotion of rats in the stable obstacle course.

579 Next, we asked whether there was any modulation of the evoked response when navigating the  
580 unstable obstacle course. In order to try and maximize the number of trials in which the encounter  
581 with the unstable step is unexpected, we adjusted the behavioural protocol at the transition  
582 between the stable and unstable test periods. This time, instead of permanently switching the  
583 centre steps to the unstable configuration, we decided to immediately revert the steps back to the  
584 stable state after the first exposure to the instability. After 20 subsequent trials in the stable state,  
585 the steps were again made unstable, and this pattern was repeated for several days.

586 Surprisingly, when we aligned the ECoG traces to contralateral paw steps on the manipulated  
587 obstacle in unstable trials, we observed a second evoked negativity, delayed in time relative to the

588 previously observed stable step evoked response, and with a much larger amplitude across the  
589 channels in the anterior grid (Figure 11B, middle left trace). Remarkably, even in the presence of  
590 such a small number of trials, the consistency of the response in every trial provided a sufficient  
591 signal-to-noise ratio for the average response to be clearly visible. Interestingly, this negativity  
592 was found to be rapidly followed by an equally large positive deflection in the potential which  
593 decayed to baseline with a much larger time constant, a response that was entirely absent from  
594 the evoked potential to stepping on a stable step. In contrast, the response to unstable steps with  
595 the ipsilateral paw did not reveal such large deflections from the baseline, although a consistent  
596 negativity could still be seen across the grid around the same time point (Figure 11B, middle right  
597 trace). The amplitude and timing of evoked responses when stepping with the contralateral paw  
598 on the same manipulated step in stable trials was largely identical to the condition where the step  
599 was permanently stable, and again was found to be absent when stepping with the ipsilateral paw  
600 (Figure 11B, bottom trace).

601 To investigate whether such a large evoked response correlated with an equally pronounced  
602 change in the overt behaviour of the animal, we extracted successive frames in the high-speed  
603 video corresponding to different time points of the trace (Figure 11C). Interestingly, there was no  
604 obvious motor response from the animal up to the point where the negativity peaks at around  
605 70 ms. In fact, the affected paw was seen to mostly follow the inertia of the rotating step and no  
606 further motor response was observed before 100 ms, roughly consistent with the compensation  
607 reaction times observed in the responses to an unexpected collapse of the steps in control animals  
608 (Figure 10). The basic features of these evoked potential profiles were recapitulated across all the  
609 remaining animals (data not shown).



## 610 Experiment Discussion

611 In this experiment, we assessed the role of motor cortical structures by making targeted lesions to  
612 areas implicated with forelimb control in the rat (*Kawai et al., 2015; Otchy et al., 2015*). Consistent  
613 with previous studies, we did not observe any conspicuous deficits in movement execution for rats  
614 with bilateral motor cortex lesions when negotiating a stable environment. Even when exposed to a  
615 sequence of unstable obstacles, animals were able to learn an efficient strategy for crossing these  
616 more challenging environments, with or without motor cortex. These movement strategies also  
617 include a preparatory component that might reflect the state of the world an animal expected to  
618 encounter. Surprisingly, these preparatory responses also did not require the presence of motor  
619 cortex.

620 It was only when the environment did not conform to expectation, and demanded a rapid  
621 adjustment, that a difference between the lesion and control groups was obvious. Animals with  
622 extensive damage to the motor cortex did not deploy a change in strategy. Rather, they halted  
623 their progression for several seconds, unable to robustly respond to the new motor challenge. In a  
624 natural setting, such hesitation could easily prove fatal. Control animals, on the other hand, were  
625 able to rapidly and flexibly reorganize their motor response to an entirely unexpected change in  
626 the environment.

627 Our preliminary investigations of the neurophysiological basis of these robust responses with  
628 ECoG have revealed the presence of large amplitude evoked potentials in the motor cortex arising  
629 specifically in response to an unexpected collapse of the steps during locomotion. Compared with  
630 evoked responses obtained from normal stepping under stable conditions ( $-100\ \mu\text{V}$  peak at 10 ms),  
631 these potentials are both much larger ( $-300\ \mu\text{V}$ ) and delayed in time (peak at 70 ms). Still, they  
632 preceded any overt behaviour corrections from the animal following the perturbation, as observed  
633 in the high-speed video recordings. The onset of these evoked potentials is in the range of the long-  
634 latency stretch reflex, which has been suggested to involve a transcortical loop through the motor  
635 cortex (*Phillips, 1969; Matthews et al., 1990; Capaday et al., 1991*). However, the simultaneous  
636 complexity and rapidity of adaptive motor responses we observed in control animals is striking, as  
637 they appear to go beyond simple corrective responses to reach a predetermined goal and include  
638 a fast switch to entirely different investigatory or compensatory motor strategies adapted to the  
639 novel situation. What is the nature of these robust responses that animals without motor cortex  
640 seem unable to deploy? What do they allow an animal to achieve? Why are cortical structures  
641 necessary for their successful and rapid deployment?

## 642 Extended Discussion

643 Is “robust control” a problem worthy of high level cortical input? Recovering from a perturbation,  
644 to maintain balance or minimize the impact of a fall, is a role normally assigned to our lower level

645 postural control systems. The corrective responses embedded in our spinal cord (*Sherrington, 1893,*  
646 *1910*), brainstem (*Arshian et al., 2014*) and midbrain (*Grillner and Shik, 1973*) are clearly important  
647 components of this stabilizing network, but are they sufficient to maintain robust movement in the  
648 dynamic environments that we encounter on a daily basis? Some insight into the requirements for  
649 a robust control system can be gained from engineering attempts to build robots that navigate in  
650 natural environments.

651 In the field of robotics, feats of precision and fine movement control (the most commonly  
652 prescribed role for motor cortex), are not a major source of difficulty. Industrial robots have long  
653 since exceeded human performance in both accuracy and execution speed (*Senoo et al., 2009*).  
654 More recently, using reinforcement learning methods, they are now able to automatically learn  
655 efficient movement strategies, given a human-defined goal and many repeated trials for fine-tuning  
656 (*Coates et al., 2008*). What then are the hard problems in robotic motor control? Why are most  
657 robots still confined to factories, i.e. controlled, predictable environments? The reason is that as  
658 soon as a robot encounters natural terrain, a vast number of previously unknown situations arise.  
659 The resulting “perturbations” are dealt with poorly by the statistical machine learning models that  
660 are currently used to train robots in controlled settings.

661 Let’s consider a familiar example: You are up early on a Sunday morning and head outside to  
662 collect the newspaper. It is cold out, so you put on a robe and some slippers, open the front door,  
663 and descend the steps leading down to the street in front of your house. Unbeknownst to you, a  
664 thin layer of ice has formed overnight and your foot is now quickly sliding out from underneath  
665 you. You are about to fall. What do you do? Well, this depends. Is there a railing you can grab  
666 to catch yourself? Were you carrying a cup of coffee? Did you notice the frost on the lawn and  
667 step cautiously, anticipating a slippery surface? Avoiding a dangerous fall, or recovering gracefully,  
668 requires a rich knowledge of the world, knowledge that is not immediately available to spinal or  
669 even brainstem circuits. This rich context relevant for robust movement is readily available in cortex,  
670 and cortex alone.

671 Imagine now that you are tasked with building a robot to collect your morning newspaper. This  
672 robot, in order to avoid a catastrophic and costly failure, would need to have all of this contextual  
673 knowledge as well. It would need to know about the structure of the local environment (e.g. hand  
674 railings that can support its weight), hot liquids and their viscosities, and even the correlation of  
675 frozen dew with icy surfaces. To be a truly robust movement machine, a robot must *understand* the  
676 physical structure of the world.

677 Reaching to stop a fall while holding a cup of coffee is not exactly the kind of feat for which  
678 we praise our athletes and sports champions, and this might explain why the difficulty of such  
679 “feats of robustness” are often overlooked. However, it would not be the first time that we find  
680 ourselves humbled by the daunting complexity of a problem that we naively assumed was trivial.  
681 Vision, for example, has remained an impressively hard task for a machine to solve at human-level

682 performance, yet it was originally proposed as an undergraduate summer project (*Papert, 1966*).  
683 Perhaps a similar misestimate has clouded our designation of the hard motor control problems  
684 worthy of cortical input.

685 Inspired by the challenges confronting roboticists, as well as our rodent behavioural results, we  
686 are now in a position to posit a new role for motor cortex.

### 687 **A primordial role for motor cortex**

688 We are seeking a role for motor cortex in non-primate mammals, animals that do not require this  
689 structure for overt movement production. The struggles of roboticists highlight the difficulty of  
690 building movement systems that robustly adapt to unexpected perturbations, and the results we  
691 report in this study suggest that this is, indeed, the most conspicuous deficit for rats lacking motor  
692 cortex. So let us propose that, in rodents, motor cortex is primarily responsible for extending the  
693 robustness of the subcortical movement systems. It is not required for control in stable, predicta-  
694 ble, non-perturbing environments, but instead specifically exerts its influence when unexpected  
695 challenges arise. This, we propose, was the original selective pressure for evolving a motor cortex,  
696 and thus, its primordial role. This role persists in all mammals, mediated via a modulation of  
697 the subcortical motor system (as is emphasized in studies of cat locomotion), and has evolved in  
698 primates to include direct control of the skeletal musculature. Our proposal of a “robust” teleology  
699 for motor cortex has a number of interesting implications.

### 700 **Implications for non-primate mammals**

701 One of the most impressive traits of mammals is the vast range of environmental niches that  
702 they occupy. While most other animals adapt to change over evolutionary time scales, mammals  
703 excel in their flexibility, quickly evaluating and responding to unexpected situations, and taking  
704 risks even when faced with challenges that have never been previously encountered (*Spinka et al.,*  
705 *2001*). This success requires more than precision, it requires resourcefulness: the ability to quickly  
706 come up with a motor solution for any situation and under any condition (*Bernstein, 1996*). The  
707 Russian neurophysiologist Bernstein referred to this ability with an unconventional definition of  
708 “dexterity”, which he considered to be distinct from a simple harmony and precision of movements.  
709 In his words, dexterity is required only when there is “a conglomerate of unexpected, unique  
710 complications in the external situations, [such as] in a quick succession of motor tasks that are all  
711 unlike each other” (*Bernstein, 1996*).

712 If Bernstein’s “robust dexterity” is the primary role for motor cortex, then it becomes clear why  
713 the effects of lesions have thus far been so hard to characterize: assays of motor behaviour typically  
714 evaluate situations that are repeated over many trials in a stable environment. Such repeated  
715 tasks were useful, as they offer improved statistical power for quantification and comparison.  
716 However, we propose that these conditions specifically exclude the scenarios for which motor

717 cortex originally evolved. It is not easy to repeatedly produce conditions that animals have not  
718 previously encountered, and the challenges in analysing these unique situations are considerable.

719 The assay reported here represents our first attempt at such an experiment, and it has already  
720 revealed that such conditions may indeed be necessary to isolate the role of motor cortex in  
721 rodents. We thus propose that neuroscience should pursue similar assays, emphasizing unexpected  
722 perturbations and novel challenges, and we have developed new hardware and software tools to  
723 make their design and implementation much easier (*Lopes et al., 2015*).

## 724 **Implications for primate studies**

725 In contrast to other mammals, primates require motor cortex for the direct control of movement.  
726 However, do they also retain its role in generating robust responses? The general paresis, or even  
727 paralysis, that results from motor cortical lesions in these species obscures the involvement of  
728 cortex in directing rapid responses to perturbations. Yet there is evidence that a role in robust  
729 control is still present in primates, including humans. For example, stroke patients with partial  
730 lesions to the distributed motor cortical system will often recover the ability to move the affected  
731 musculature. However, even after recovering movement, stroke patients are still prone to severe  
732 impairments in robust control: unsupported falls are one of the leading causes of injury and  
733 death in patients surviving motor cortical stroke (*Jacobs, 2014*). We thus suggest that stroke  
734 therapy, currently focused on regaining direct movement control, should also consider strategies  
735 for improving robust responses.

736 Even if we acknowledge that a primordial role of motor cortex is still apparent in primate  
737 movement control, it remains to be explained why the motor cortex of these species acquired direct  
738 control of basic movements in the first place. This is an open question.

## 739 **Some speculation on the role of direct cortical control**

740 What happens when cortex acquires direct control of movement? First, it must learn how to use  
741 this influence, bypassing or modifying lower movement controllers. While functional corticospinal  
742 tract connections may be established prenatally (*Eyre et al., 2000*), the refinement of corticospinal  
743 dependent movements, which must override the lower motor system, takes much longer and  
744 coincides with the lengthy maturation period of corticospinal termination patterns (*Lawrence and  
745 Hopkins, 1976*). Humans require years of practice to produce and refine basic locomotion and  
746 grasping (*Thelen, 1985; von Hofsten, 1989*), motor behaviours that are available to other mammals  
747 almost immediately after birth. This may be the cost of giving cortex direct control of movement—it  
748 takes more time to figure out how to move the body—but what is the benefit?

749 Giving motor cortex direct control over the detailed dynamics of movement might simply have  
750 extended the range and flexibility of robust responses. This increased robustness may have been  
751 required for primates to negotiate more difficult unpredictable environments, such as the forest

752 canopy. Direct cortical control of the musculature may have evolved because it allowed primates to  
753 avoid their less “dexterous” predators simply by ascending, and robustly negotiating, the precarious  
754 branches of tree tops. However, the consequences of this cortical “take-over” might be even more  
755 profound.

756 With motor cortex in direct control of overt movements, the behaviour of a primate is a more  
757 direct reflection of cortical state: when you watch a primate move you are directly observing  
758 cortical commands. For species that live in social groups, this would allow a uniquely efficient  
759 means of communicating the state of cortex between conspecifics, a rather significant advantage  
760 for group coordination and a likely prerequisite for human language. This novel role for motor  
761 cortex—communication—might have exerted the evolutionary pressure to give cortex increasing  
762 control over basic movements, ultimately obscuring its primordial, and fundamental, role in robust  
763 control.

#### 764 **Some preliminary conclusions**

765 Clearly our results are insufficient to draw any final conclusion, but that is not our main goal. We  
766 present these experiments to support and motivate our attempt to distil a long history of research,  
767 and ultimately suggest a new approach to investigating the role of motor cortex. This approach  
768 most directly applies to studies of non-primate mammals. There is now a host of techniques to  
769 monitor and manipulate cortical activity during behaviour in these species, but we propose that  
770 we should be monitoring and manipulating activity during behaviours that actually require motor  
771 cortex.

772 This synthesis also has implications for engineers and clinicians. We suggest that acknowledging  
773 a primary role for motor cortex in robust control, a problem still daunting to robotics engineers,  
774 can guide the development of new approaches for building intelligent machines, as well as new  
775 strategies to assess and treat patients with motor cortical damage. We concede that our results are  
776 still naïve, but propose that the implications are worthy of further consideration.

## 777 **Methods**

778 All experiments were approved by the Champalimaud Foundation Bioethics Committee and the  
779 Portuguese National Authority for Animal Health, Direcção-Geral de Alimentação e Veterinária  
780 (DGAV).

### 781 **Permanent lesions**

782 Ibotenic acid was injected bilaterally in 11 Long-Evans rats (ages from 83 to 141 days; 9 females,  
783 2 males), at 3 injection sites with 2 depths per site (−1.5 mm and −0.75 mm from the surface of  
784 the brain). At each depth we injected a total amount of 82.8 nL using a microinjector (Drummond  
785 Nanoject II, 9.2 nL per injection, 9 injections per depth). The coordinates for each site, in mm with  
786 respect to Bregma, were: +1.0 AP / 2.0 ML; +1.0 AP / 4.0 ML; +3.0 AP / 2.0 ML, following the protocol  
787 reported by Kawai et al. for targeting forelimb motor cortex (*Kawai et al., 2015*). Five other animals  
788 were used as sham controls (age-matched controls; 3 females, 2 males), subject to the same  
789 intervention, but where ibotenic acid was replaced with physiological saline. Six additional animals  
790 were used as wildtype, no-surgery, controls (age-matched controls; 6 females).

791 For the frontal cortex aspiration lesions, the margins of the craniotomy were extended to cover  
792 from -2.0 to +5.0 mm AP relative to Bregma and laterally from 0.5 mm up to the temporal ridge of the  
793 skull. After removal of the skull, the exposed dura was cut and removed, and the underlying tissue  
794 aspirated to a depth of 2 to 3 mm with a fine pipette (*Whishaw, 2000*). For the frontoparietal cortical  
795 lesions, the craniotomy extended from -6.0 to +4.0 mm AP relative to Bregma and laterally from 0.5  
796 mm up to the temporal ridge. Two of these animals underwent aspiration lesions as described above.  
797 In the remaining animal, the lesion was induced by pial stripping in order to further restrict the  
798 damage to cortical areas. After removal of the dura, the underlying pia, arachnoid and vasculature  
799 were wiped with a sterile cotton swab until no vasculature was visible (*Farr and Whishaw, 2002*).

### 800 **Recovery period**

801 After the surgeries, animals were given a minimum of one week (up to two weeks) recovery period  
802 in isolation. After this period, animals were handled every day for a week, after which they were  
803 paired again with their age-matched control to allow for social interaction during the remainder of  
804 the recovery period. In total, all animals were allowed at least one full month of recovery before  
805 they were first exposed to the behaviour assay.

806 The three largest frontoparietal lesioned animals were originally prepared for a study of beha-  
807 viour in a dynamic visual foraging task, which they were exposed to for one month in addition to  
808 the recovery period described above. This task did not, however, require any challenging motor  
809 behaviours besides locomotion over a completely flat surface. This period was also used to monitor  
810 the overall health condition of the animals and to facilitate sensorimotor recovery as much as  
811 possible. The animal with the largest lesion (Extended Lesion F) was prevented from completing the

812 behaviour protocol due to deteriorating health conditions following the first two days of testing.

### 813 **Histology**

814 All animals were perfused intracardially with 4% paraformaldehyde in phosphate buffer saline (PBS)  
815 and brains were post-fixed for at least 24 h in the same fixative. Serial coronal sections (100  $\mu$ m) were  
816 Nissl-stained and imaged for identification of lesion boundaries. In two of the largest frontoparietal  
817 lesions (Extended Lesions D and E), serial sections were taken sagittally.

818 In order to reconstruct lesion volumes, the images of coronal sections were aligned and the  
819 outlines of both brain and lesions were manually traced in Fiji (*Schindelin et al., 2012*) and stored  
820 as two-dimensional regions of interest. Lesion volumes were calculated by summing the area of  
821 each region of interest multiplied by the thickness of each slice. The stored regions were also used  
822 to reconstruct a 3D polygon mesh for visualization of lesion boundaries.

### 823 **Electrocorticography**

824 Recording of electrophysiological signals from the intact rodent cortex was performed using two  
825 high-density 64-channel micro-electrocorticography (micro-ECoG) grids using the method reported  
826 by Dimitriadis et al. for freely moving animals (*Dimitriadis et al., 2014*). The particular grids used  
827 in these experiments were fabricated at the International Iberian Nanotechnology Laboratory by  
828 depositing microelectrode gold contacts through a custom designed layout mask on a flexible  
829 thin-film polyimide substrate (Figure 11A). The soft connectors at the end of each grid are inserted  
830 during the implantation surgery into a custom made breakout board in the recording chamber,  
831 which exposes groups of 32-channels via Omnetics connectors to the recording amplifier (see data  
832 acquisition section).

833 The microelectrode grids were implanted epidurally into the right hemisphere of three male  
834 Long-Evans rats at almost two years of age. The margins of the craniotomy for implantation  
835 extended from -3.3 to +5.0 mm AP relative to Bregma and laterally from 1.5 to 4.0 mm. The anterior  
836 grid was first placed carefully on top of the brain, and then slowly inserted below the anterior and  
837 medial margins of the craniotomy until the first rows of electrodes were fully covered. The second  
838 grid was placed posterior to the first one and inserted below the medial margin of the craniotomy,  
839 taking care that the first rows of electrodes were kept equidistant from the last row of electrodes  
840 in the anterior grid. Two zirconium hooks were inserted in the anterior and posterior margins of  
841 the craniotomy and fixed to the recording chamber in order to hold it firmly in place relative to the  
842 skull. With the aid of a micromanipulator and video feedback system, the coordinates of different  
843 electrodes in each quadrant of both grids were measured relative to Bregma, and later used to  
844 reconstruct the precise placement of all grid electrodes in the brain. At the end of the surgery, a  
845 titanium screw was inserted posteriorly to the craniotomy in contact with the brain in order to be  
846 used as reference for the recording system. The stability of the implant depends critically on the



847 absence of movement in the bony plates of the skull during development, which can compromise  
848 the mechanical fixation of the recording chamber to the head (*Dimitriadis et al., 2014*). For this  
849 reason, it is recommended that rats undergoing this procedure should be older than 7 months  
850 (*Dimitriadis et al., 2014*).

### 851 **Behaviour assay**

852 During each session the animal was placed inside a behaviour box for 30 min, where it could collect  
853 water rewards by shuttling back and forth between two nose pokes (Island Motion Corporation,  
854 USA). To do this, animals had to cross a 48 cm obstacle course composed of eight 2 cm aluminium  
855 steps spaced by 4 cm (Figure 2A). The structure of the assay and each step in the obstacle course  
856 was built out of aluminium structural framing (Bosch Rexroth, DE, 20 mm series). The walls of the  
857 arena were fabricated with a laser-cutter from 5 mm thick opaque black acrylic and fixed to the  
858 structural framing. A transparent acrylic window partition was positioned in front of the obstacle  
859 course in order to provide a clear view of the animal. All experiments were run in the dark by having  
860 the behavioural apparatus enclosed in a light tight box.

861 A motorized brake allowed us to lock or release each step in the obstacle course (Figure 2B).  
862 The shaft of each of the obstacles was coupled to an acrylic piece used to control the rotational  
863 stability of each step. In order to lock a step in a fixed position, two servo motors are actuated to  
864 press against the acrylic piece and hold it in place. Two other acrylic pieces were used as stops to  
865 ensure a maximum rotation angle of approximately  $\pm 100^\circ$ . Two small nuts were attached to the  
866 bottom of each step to work as a counterweight that gives the obstacles a tendency to return to  
867 their original flat configuration. In order to ensure that noise from servo motor actuation could  
868 not be used as a cue to tell the animal about the state of each step, the motors were always set to  
869 press against an acrylic piece, either the piece that keeps the step stabilized, or the acrylic stops. At  
870 the beginning of each trial, the motors were run through a randomized sequence of positions in  
871 order to mask information about state transitions and also to ensure the steps were reset to their  
872 original configuration. Control of the motors was done using a Motoruino board (Artica, PT) along  
873 with a custom workflow written in the Bonsai visual programming language (*Lopes et al., 2015*).

874 Prior to the micro-ECoG recordings, each step in the obstacle course was outfitted with a micro  
875 load cell (CZL616C, Phidgets, CA) secured between the step front holder and the base (Figure  
876 2B). This allowed us to record a varying voltage signal proportional to the load applied by the  
877 animal on each step. This load signal was acquired simultaneously on all eight steps and digitized  
878 synchronously with the ECoG data acquisition system.

### 879 **Data acquisition**

880 The behaviour of the animals was recorded with a high-speed and high-resolution videography  
881 system (1280x680 @ 120 Hz) using an infrared camera (Flea3, PointGrey, CA), super-bright infrared

882 LED front lights (SMD5050, 850 nm) and a vari-focal lens (Fujinon, JP) positioned in front of the  
883 transparent window partition. A top view of the assay was simultaneously recorded with the same  
884 system at a lower frame-rate (30 Hz) for monitoring purposes. All video data was encoded with  
885 MPEG-4 compression for subsequent offline analysis. Behaviour data acquisition for the nose  
886 poke beam breaks was done using an Arduino board (Uno, Arduino, USA) and streamed to the  
887 computer via USB. All video and sensor data acquisition was recorded in parallel using the same  
888 Bonsai workflow used to control the behaviour assay.

889 For the micro-ECoG recordings, all electrophysiological signals were amplified, digitized and  
890 multiplexed using two 64-channel amplifier boards (RHD2164, Intan Technologies, US) connected  
891 to the electrode interface board (EIB) on the recording chamber. The amplifier boards were then  
892 connected through a dual headstage adapter (C3440, Intan Technologies, US) to the main data  
893 acquisition USB interface board (RHD2000-Eval, Intan Technologies, US). In order to facilitate the  
894 free movement of the animal in the behaviour box, the single cable connecting the head of the  
895 animal to the USB interface board was passed through a slip ring (MMC235, Moflon, CN) and hooked  
896 into a nylon string crossing the top of the assay. In this way, movement and rotation of the tethered  
897 animal were compensated to avoid unwanted strain and twisting on the cables during the entire  
898 recording period.

899 In order to synchronize the videography and ECoG recording systems, we connected the strobe  
900 output of the camera to a digital input in the Intan USB interface board using a GPIO cable (ACC-  
901 01-3000, PointGrey, CA). The camera strobe output is electronically coupled to individual frame  
902 exposures (i.e. shutter opening and closing events), and can be used for sub-millisecond readout  
903 of individual frame acquisition times. The strobe signal was acquired and digitized synchronously  
904 with ECoG data acquisition, and used for *post-hoc* reconstruction of precise frame timing. Data  
905 acquisition from the USB interface board was recorded using a Bonsai workflow and care was  
906 taken that it was always started first and terminated last in order to ensure that no external  
907 synchronization events were lost.

## 908 **Behaviour protocol**

909 The animals were kept in a state of water deprivation for 20h prior to each daily session. For every  
910 trial, rats were delivered a 20  $\mu$ L drop of water. At the end of each day, they were given free access  
911 to water for 10 min before initiating the next deprivation period. Sessions lasted for six days of the  
912 week from Monday to Saturday, with a day of free access to water on Sunday. Before the start of  
913 the water deprivation protocol, animals were run on a single habituation session where they were  
914 placed in the box for a period of 15 min.

915 The following sequence of conditions were presented to the animals over the course of a month  
916 (see also Figure 2A): day 0, habituation to the box; day 1-4, all the steps were fixed in a stable  
917 configuration; day 5, 20 trials of the stable configuration, after which the two centre steps were

918 made unstable (i.e. free to rotate); day 6-10, the centre two steps remained unstable; day 11, 20  
919 trials of the unstable configuration, after which the two centre steps were again fixed in a stable  
920 state; day 12, all the steps were fixed in a stable configuration; day 13-16, the state of the centre  
921 two steps was randomized on a trial-by-trial basis to be either stable or unstable. Following the  
922 end of the random protocol, animals continued to be tested in the assay for a variable number of  
923 days (up to one week) in different conditions. At the end of the testing period, all animals were  
924 exposed to a final session where all steps were made free to rotate in order to assay locomotion  
925 performance under challenging conditions.

926 For the micro-ECoG recordings, the basic behaviour protocol was adjusted to allow for extra  
927 recording time during conditions of interest. First, all session times were doubled for the recordings  
928 (e.g. 30 min for the habituation session, and 60 min for all other sessions). Second, the number of  
929 days on each condition was also extended to allow extracting more trials from each animal for  
930 analysis. Finally, the condition where the centre two steps were reliably unstable was replaced  
931 with a condition of rare instability. In this condition, after the animal is exposed to an unstable  
932 configuration, the steps are reverted back to being stable for another 20 trials, after which they  
933 become again unstable for one trial, and so on.

### 934 **Data analysis**

935 All scripts and custom code used for data analysis are available online<sup>1</sup>. The raw video data was first  
936 pre-processed using a custom Bonsai workflow in order to extract features of interest (Figure 2C).  
937 Tracking of the nose was achieved by background subtraction and connected component labelling of  
938 segmented image elements. First we compute the ellipse best-fit to the largest object in the image.  
939 We then mark the tip of the nose as the furthestmost point, in the segmented shape of the animal,  
940 along the major axis of the ellipse. In order to analyse stepping performance, regions of interest  
941 were defined around the surface of each step and in the gaps between the steps. Background  
942 subtracted activity over these regions was recorded for every frame for subsequent detection and  
943 classification of steps and slips.

944 Analysis routines were run using the NumPy scientific computing package (*van der Walt et al.,*  
945 *2011*) and the Pandas data analysis library (*McKinney, 2010*) for the Python programming language.  
946 Crossings were automatically extracted from the nose trajectory data by first detecting consecutive  
947 time points where the nose was positively identified in the video. In order for these periods to be  
948 successfully marked as crossings, the starting position of the nose must be located on the opposite  
949 side of the ending position. Inside each crossing, the moment of stepping with the forelimb on  
950 the centre steps was extracted by looking at the first peak above a threshold in the first derivative  
951 of the activation signal in the corresponding region of interest. False positive classifications due  
952 to hindlimb or tail activations were eliminated by enforcing the constraint that the position of the

<sup>1</sup><https://bitbucket.org/kampff-lab/shuttling-analysis>

953 head must be located before the next step. Visual confirmation of the classified timepoints showed  
954 that spurious activations were all but eliminated by this procedure as stepping with the hindlimb or  
955 tail requires the head to be further ahead in space unless the animal turned around (in which case  
956 the trajectory would not be marked as a crossing anyway). The position of the nose at the moment  
957 of each step was extracted and found to be normally distributed, so statistical analysis of the step  
958 posture in the random condition used an unpaired t-test to check for independence of different  
959 measurement groups.

960 In order to evaluate the dynamics of crossing in the random condition, we first measured for  
961 every trial the speed at which the animals were moving on each spatial segment of the assay.  
962 To minimize overall trial-by-trial variation in individual animal performance, we used the average  
963 speed at which the animal approached the manipulated step as a baseline and subtracted it from  
964 the speed at each individual segment. To summarize differences in performance between stable  
965 and unstable trials, we then computed the average speed profile for each condition, and then  
966 subtracted the average speed profile for unstable trials from the average speed profile for stable  
967 trials. Finally, we computed the sum of all these speed differences at every segment in order to  
968 obtain the speedup index for each animal, i.e. an index of whether the animal tends to accelerate  
969 or decelerate across the assay on stable versus unstable trials.

970 For the micro-ECoG experiments, evoked potentials were analysed by splitting the raw physiologi-  
971 cal voltage traces into 750ms windows, where time zero was aligned to the moment of stepping  
972 with the forelimb on one of the obstacles in the course (see below). Each individual time series was  
973 low-pass filtered at 50 Hz (4th order Butterworth filter, two-pass) and baselined by subtracting the  
974 average of the first 250ms before event onset in order to compensate for constant voltage shifts  
975 between the two grids. Some of the channels in each grid were entirely excluded from the analysis  
976 due to potentially damaged surface contacts, as evidenced by wide amplitude, random oscillatory  
977 behaviour, which was often matched by the presence of high impedance measurements extracted  
978 from the electrode site in vivo. In one of the sessions, the cable connecting the headstage to the  
979 interface board was accidentally removed by the animal, and all the trials falling during this period  
980 had to be excluded from analysis. Correspondence between individual ECoG samples and video  
981 frames was computed by matching the individual hardware frame counter with the sequence of  
982 falling edges detected in the shutter strobe signal acquired from the infrared camera.

### 983 **Video classification**

984 Classification of paw placement faults (i.e. slips) was performed in semi-automated fashion. First,  
985 possible slip timepoints were detected automatically using the peak detection method outlined  
986 above. All constraints on head position were relaxed for this analysis in order to exclude the  
987 possibility of false negatives. A human classifier then proceeded to manually go through each  
988 of the slip candidates and inspect the video around that timepoint in order to assess whether

989 the activation peak was a genuine paw placement fault. Examples of false positives include tail  
990 and head activations as well as paw activations that occur while the animal is actively engaged in  
991 exploration, rearing, or other activities that are unrelated to crossing the obstacles.

992 A similar technique was used to detect and classify the event onsets for the analysis of evoked  
993 potentials in the micro-ECoG experiments. In this case, a preliminary classification of each video  
994 frame into left and right forelimb was achieved by first computing the brightness histogram of each  
995 frame, which was used to encode the image as a lower-dimensional vector. The vectors for all  
996 step frames were subsequently clustered using K-means and then manually inspected for label  
997 correction.

998 Classification of behaviour responses following first exposure to the unstable condition was done  
999 on a frame-by-frame analysis of the high-speed video aligned on first contact with the manipulated  
1000 step. The frame of first contact was defined as the first frame in which there is noticeable movement  
1001 of the step caused by animal contact. Three main categories of behaviour were observed to follow  
1002 the first contact: compensation, investigation and halting. Behaviour sequences were first classified  
1003 as belonging to one of these categories and their onsets and offsets determined by the following  
1004 criteria. Compensation behaviour is defined by a rapid and adaptive postural correction to the  
1005 locomotion pattern in response to the perturbation. Onset of this behaviour is defined by the first  
1006 frame in which there is visible rapid contraction of the body musculature following first contact.  
1007 Investigation behaviour consists of periods of targeted interaction with the steps, often involving  
1008 manipulation of the freely moving obstacle with the forepaws. The onset of this behaviour is defined  
1009 by the animal orienting its head down to one of the manipulated steps, followed by subsequent  
1010 interaction. Halting behaviour is characterized by a period in which the animal stops its ongoing  
1011 motor program, and maintains the same body posture for several seconds, without switching to a  
1012 new behaviour or orienting specifically to the manipulated steps. This behaviour is distinct from  
1013 a freezing response, as occasional movements of the head are seen. Onset of this behaviour is  
1014 defined by the moment where locomotion and other motor activities besides movement of the  
1015 head come to a stop. A human classifier blind to the lesion condition was given descriptions of each  
1016 of these three main categories of behaviour and asked to note onsets and offsets of each behaviour  
1017 throughout the videos. These classifications provide a visual summary of the first response videos;  
1018 the complete dataset used for this classification is included as supplementary movies.

1019 **Author contributions**

1020 Conceived and designed the lesion experiments: G.L., A.R.K., J.J.P.; Performed the lesion experiments:  
1021 G.L., J.N.; Analysed the lesion data: G.L., A.R.K.; Conceived and designed the ECoG experiments:  
1022 G.L., G.D., A.R.K., J.J.P.; Performed the ECoG implantation surgeries: G.D., J.N.; Performed the  
1023 ECoG behaviour experiments: G.L.; Analysed the ECoG data: G.L., G.D., J.A.M., A.R.K.; Wrote the  
1024 manuscript: G.L., A.R.K.

1025 **Competing interests**

1026 The authors declare that the research was conducted in the absence of any commercial or financial  
1027 relationships that could be construed as a potential conflict of interest.

1028 **Acknowledgements**

1029 We thank Lorenza Calcaterra for the extended frontoparietal cortical lesion preparations; João  
1030 Gaspar of the International Iberian Nanotechnology Laboratory for kindly providing the fabrication  
1031 process for the micro-ECoG grids; João Frazão, Pedro Lacerda and Tiago Monteiro for invaluable  
1032 help in extending the behaviour assay for the micro-ECoG recordings and all the members of the  
1033 Intelligent Systems Lab for constant feedback on the ideas, experiments and manuscript as well as  
1034 help annotating behaviour videos. The research leading to these results has received funding from  
1035 the European Union's Seventh Framework Programme (FP7/2007-2013) under grant agreement no.  
1036 600925. G.L. was supported by the PhD Studentship SFRH/BD/51714/2011 from the Foundation  
1037 for Science and Technology. The Champalimaud Neuroscience Programme is supported by the  
1038 Champalimaud Foundation.

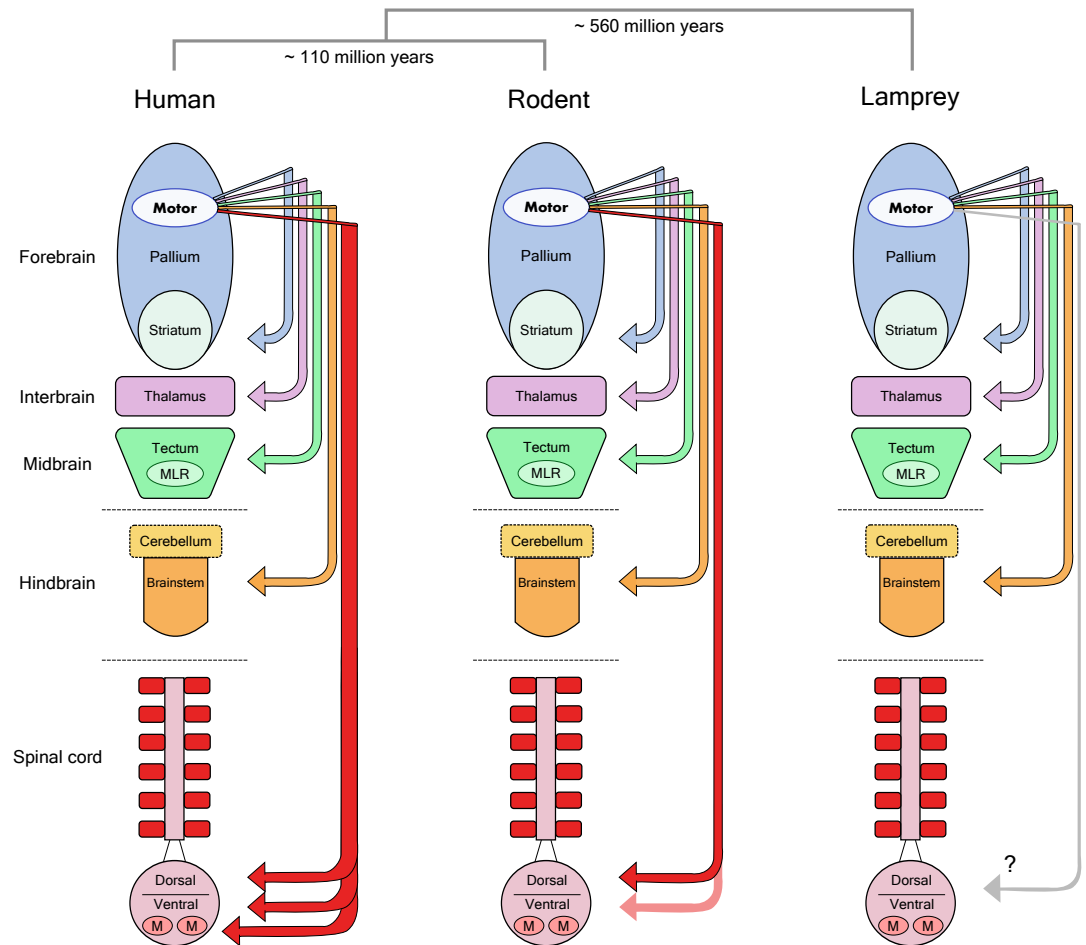

**Figure 1.** Forebrain motor control pathways across different vertebrate taxa. The molecular divergence times between human (primate), rodent and lamprey groups *Kumar and Hedges (1998)* are noted above a schematic view of the major divisions in the vertebrate brain. Arrows indicate the descending monosynaptic projections identified in each group from motor regions of the forebrain pallium to lower motor centres. Note the specialized monosynaptic projection directly targeting spinal motor neurons in human. MLR, Mesencephalic Locomotor Region; M, Motor Neurons.

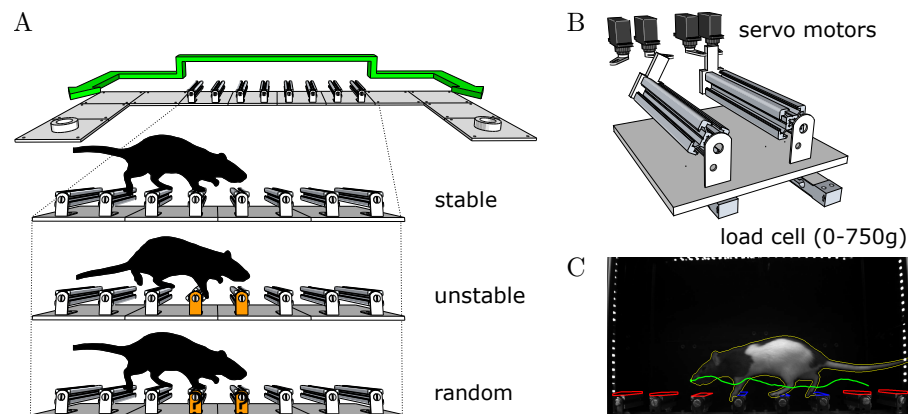

**Figure 2.** An obstacle course for rodents. **(A)** Schematic of the apparatus and summary of the different conditions in the behaviour protocol. Animals shuttle back and forth between two reward ports at either end of the enclosure. **(B)** Schematic of the locking mechanism that allows each individual step to be made stable or unstable on a trial-by-trial basis. **(C)** Example video frame from the behaviour tracking system. Coloured overlays represent regions of interest and feature traces extracted automatically from the video.



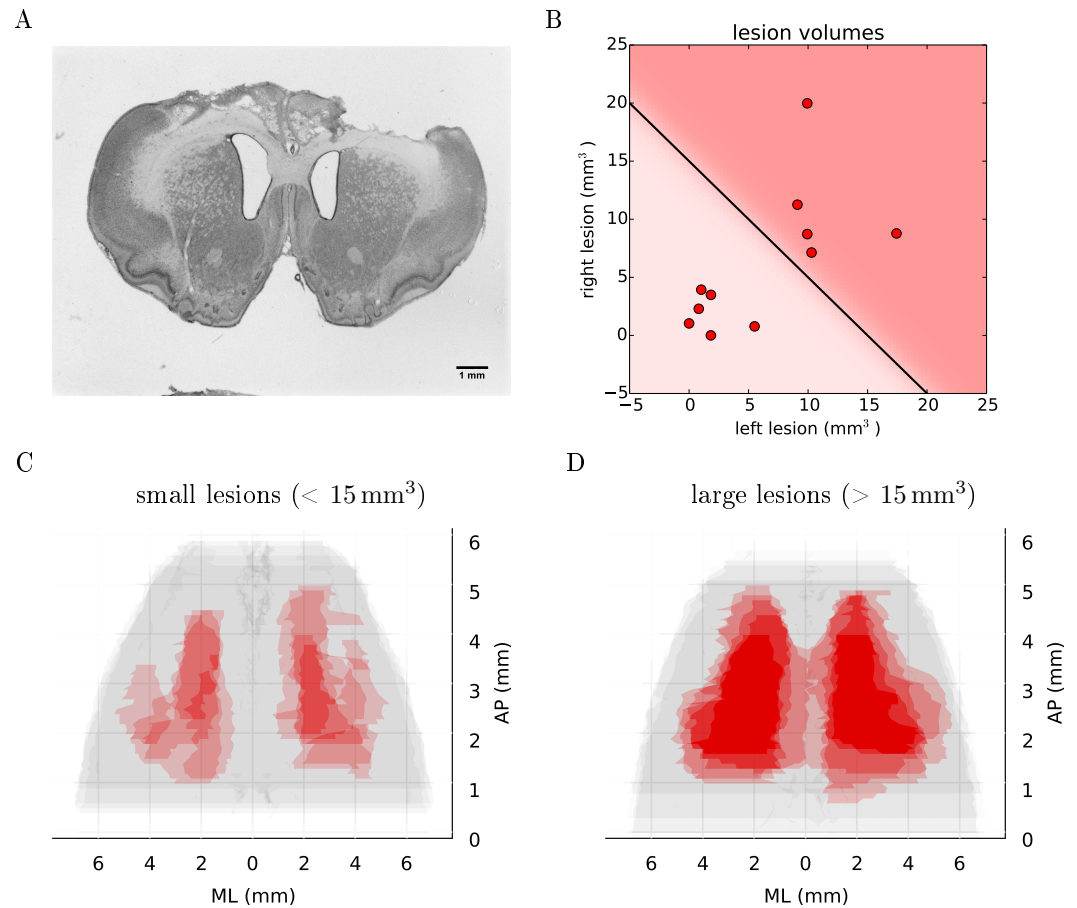

**Figure 3.** Histological analysis of lesion size. **(A)** Representative example of Nissl-stained coronal section showing bilateral ibotenic acid lesion of primary and secondary forelimb motor cortex. **(B)** Distribution of lesion volumes in the left and right hemispheres for individual animals. A lesion was considered “large” if the total lesion volume was above 15 mm<sup>3</sup>. **(C)** Super-imposed reconstruction stacks for all the small lesions ( $n = 6$ ). **(D)** Super-imposed reconstruction stacks for all the large lesions ( $n = 5$ ).

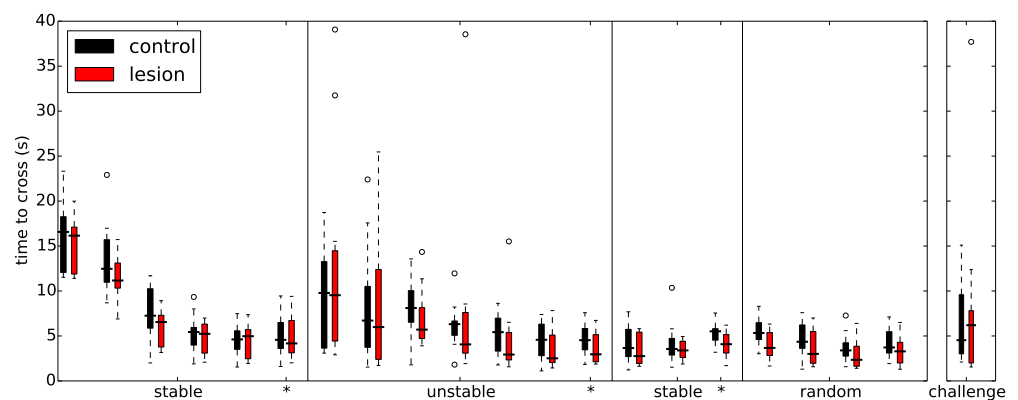

**Figure 4.** Overall performance on the obstacle course is similar for both lesion ( $n = 11$ ) and control animals ( $n = 11$ ) across the different protocol stages. Each set of coloured bars represents the distribution of average time to cross the obstacles on a single session. Asterisks indicate sessions where there was a change in assay conditions during the session (see text). In these transition sessions, the average performance on the 20 trials immediately preceding the change is shown to the left of the solid vertical line whereas the performance on the remainder of that session (after the change) is shown to the right.

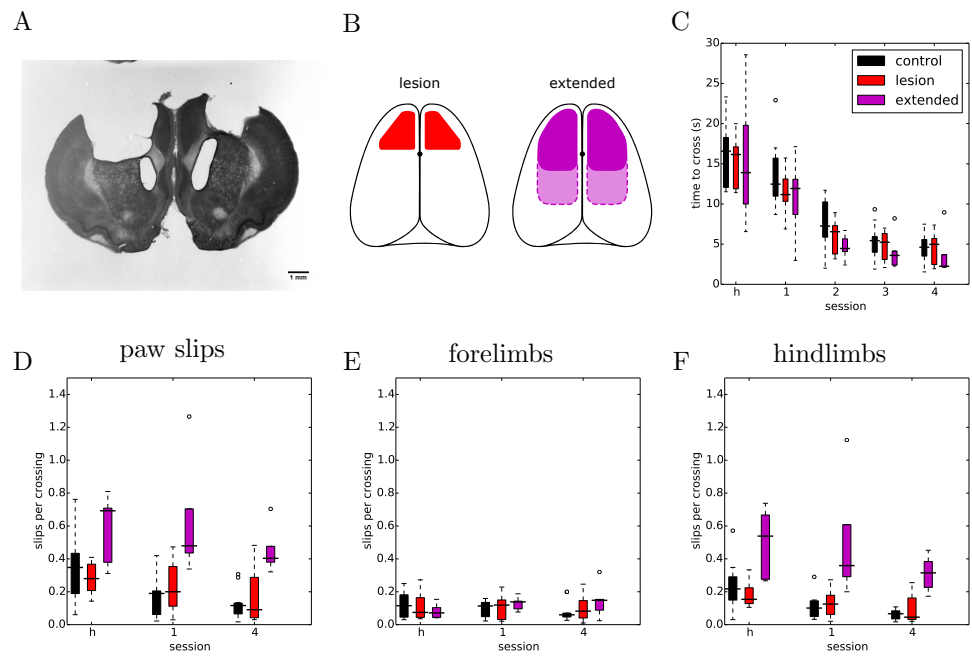

**Figure 5.** Extended frontoparietal cortex lesions perform as well as control animals despite impaired hindlimb control. **(A)** Representative example of Nissl-stained coronal section showing bilateral aspiration lesion of forelimb sensorimotor cortex. **(B)** Schematic depicting targeted lesion areas in the different animal groups. Left: outline of bilateral ibotenic acid lesions to the motor cortex. Right: outline of extended bilateral frontoparietal cortex lesions. Solid outline represents frontal cortex targeted lesions and dotted outline the more extensive frontoparietal lesions. **(C)** Average time required to cross the obstacles in the stable condition for extended lesions ( $n = 5$ ). Performance of the other groups is shown for comparison. **(D)** Average number of slips per crossing in early versus late sessions of the stable condition. **(E)** Same data showing only forelimb slips. **(F)** Same data showing only hindlimb slips.

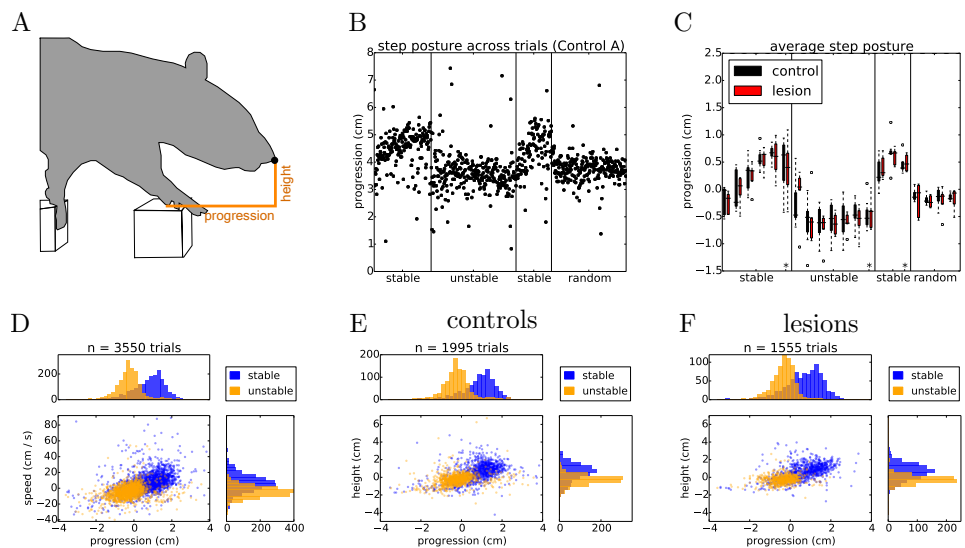

**Figure 6.** Rats adapt their postural approach to the obstacles after a change in physics. **(A)** Schematic of postural analysis image processing. The position of the animal's nose is extracted whenever the paw activates the ROI of the first manipulated step (see methods). **(B)** The horizontal position, i.e. progression, of the nose in single trials for one of the control animals stepping across the different conditions of the shuttling protocol. **(C)** Average horizontal position of the nose across the different protocol stages for both lesion and control animals. Asterisks indicate the average nose position on the 20 trials immediately preceding a change in protocol conditions (see text). **(D)** Distribution of horizontal position against speed for the last two days of the stable (blue) and unstable (orange) protocol stages. **(E-F)** Distribution of nose positions for control and lesion animals over the same sessions.

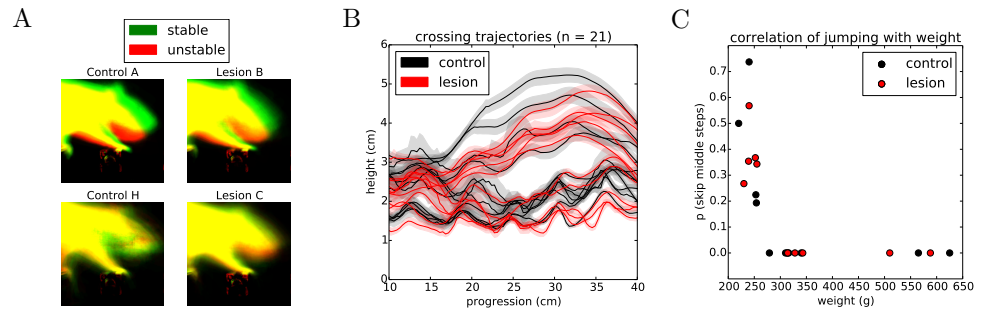

**Figure 7.** Animals use different strategies for dealing with the unstable obstacles. **(A)** Example average projection of all posture images for stable (green) and unstable (red) sessions for two non-jumper (top) and two jumper (bottom) animals. **(B)** Average nose trajectories for individual animals crossing the unstable condition. The shaded area around each line represents the 95% confidence interval. **(C)** Correlation of the probability of skipping the center two steps with the weight of the animal.

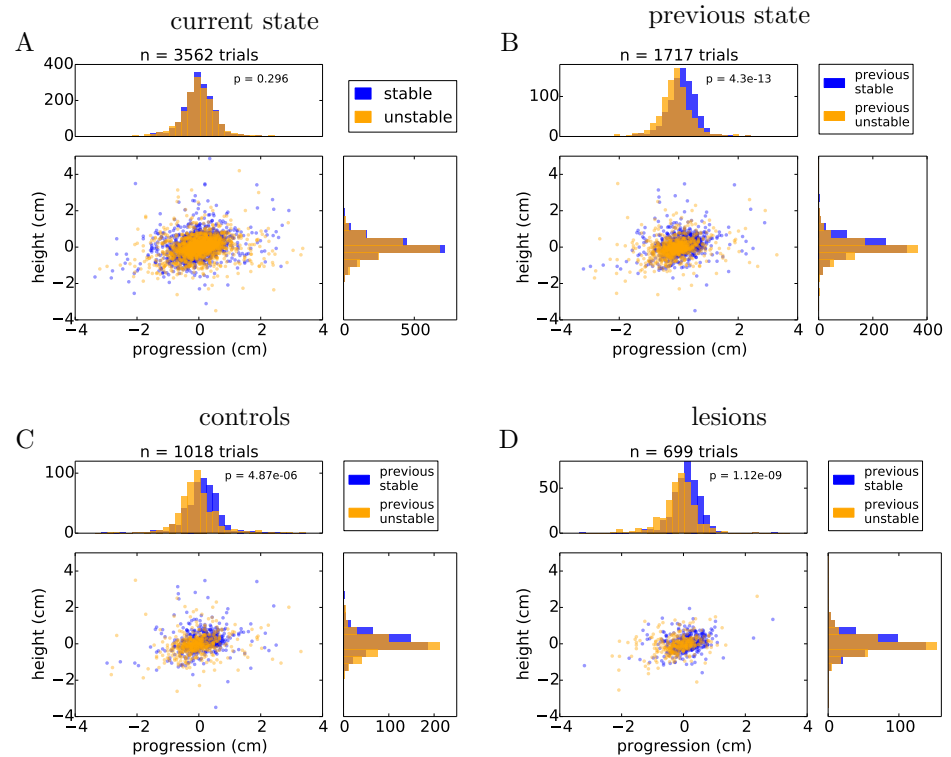

**Figure 8.** Animals adjust their posture on a trial-by-trial basis to the expected state of the world. **(A)** Distribution of nose positions on the randomized protocol when stepping on the first manipulated obstacle, for trials in which the current state was stable (blue) or unstable (orange). **(B)** Distribution of nose positions for trials in which the previous two trials were stable (blue) or unstable (orange). **(C-D)** Same data as in **(B)** split by the control and lesion groups.  $p$  values from Student's unpaired t-test are indicated.

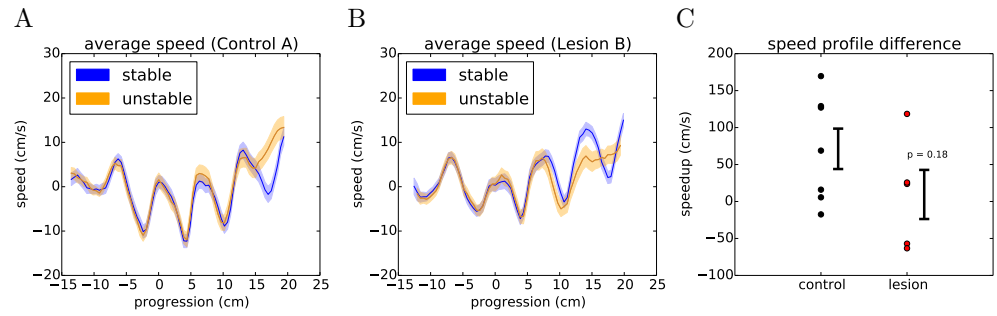

**Figure 9.** Encountering different states of the randomized obstacles causes the animals to quickly adjust their movement trajectory. **(A)** Example average speed profile across the obstacles for stable (blue) and unstable (orange) trials in the randomized sessions of a control animal (see text). The shaded area around each line represents the 95% confidence interval. **(B)** Respectively for one of the largest lesions. **(C)** Summary of the average difference between the speed profiles for stable and unstable trials across the two groups of animals. Error bars show standard error of the mean.  $p$  value from Student's unpaired t-test is indicated.

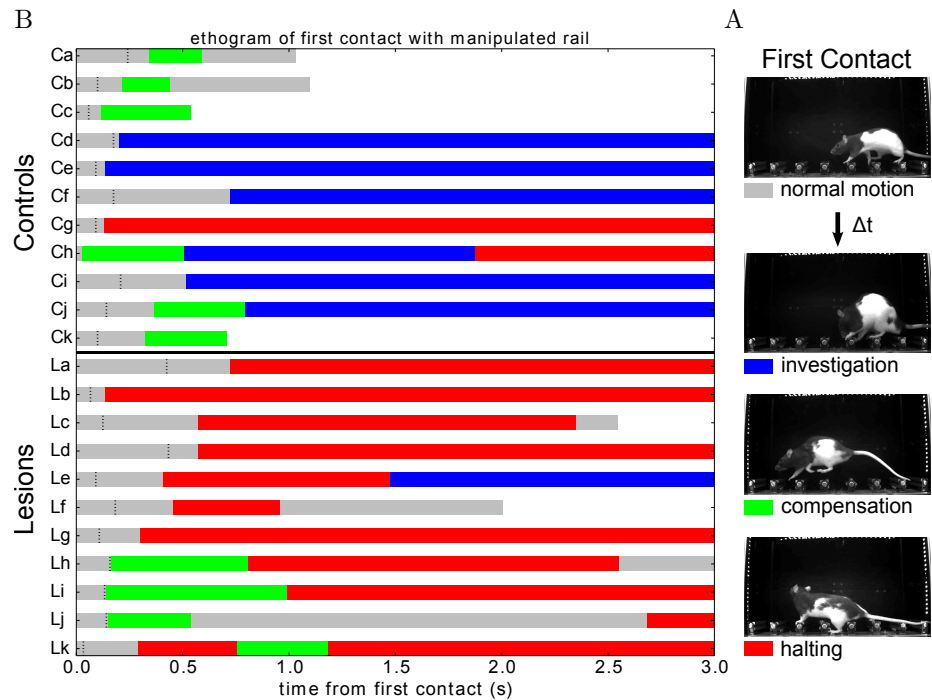

**Figure 10.** Responses to an unexpected change in the environment. **(A)** Response types observed across individuals upon first encountering an unpredicted instability in the state of the centre obstacles. **(B)** Ethogram of behavioural responses classified according to the three criteria described in **(A)** and aligned (0.0) on first contact with the newly manipulated obstacle. Black dashes indicate when the animal exhibits a pronounced ear flick. White indicates that the animal has crossed the obstacle course.

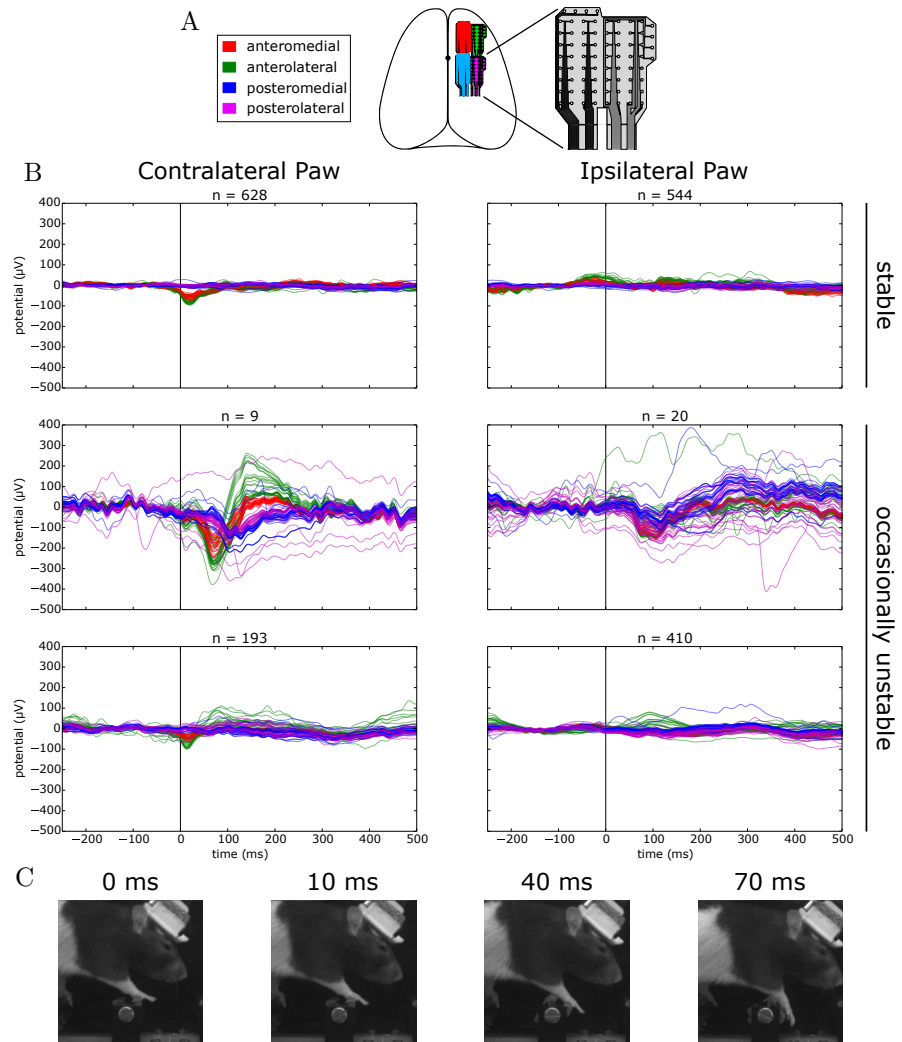

**Figure 11.** Evoked responses to stepping on stable versus occasionally unstable steps. **(A)** Schematic depicting the location of implanted ECoG grids. **(B)** Average voltage traces aligned on stepping with the contra- or ipsilateral paw on a manipulated step. Top: sessions where the step was permanently stable. Bottom: sessions where the step was occasionally made unstable. The middle row shows traces for unstable trials and the lower row the traces for the remaining stable trials. **(C)** Example frames of the behaviour of the animal at different time points of an unstable trial.

## 1039 References

- 1040 **Aflalo TN**, Graziano MSA. Possible origins of the complex topographic organization of motor cortex: reduction  
1041 of a multidimensional space onto a two-dimensional array. 2006 *The Journal of neuroscience : the official*  
1042 *journal of the Society for Neuroscience*; doi: [10.1523/JNEUROSCI.0768-06.2006](https://doi.org/10.1523/JNEUROSCI.0768-06.2006).
- 1043 **Alaverdashvili M**, Whishaw IQ. Motor cortex stroke impairs individual digit movement in skilled reaching by  
1044 the rat. 2008 *The European journal of neuroscience*; doi: [10.1111/j.1460-9568.2008.06315.x](https://doi.org/10.1111/j.1460-9568.2008.06315.x).
- 1045 **Armstrong DM**, Drew T. Discharges of pyramidal tract and other motor cortical neurones during locomotion in  
1046 the cat. 1984 *The Journal of Physiology*;
- 1047 **Arshian MS**, Hobson CE, Catanzaro MF, Miller DJ, Puterbaugh SR, Cotter La, Yates BJ, McCall aa. Vestibu-  
1048 lar nucleus neurons respond to hindlimb movement in the decerebrate cat. 2014 *J Neurophysiol*; doi:  
1049 [10.1152/jn.00855.2013](https://doi.org/10.1152/jn.00855.2013).
- 1050 **Baker MR**, Javid M, Edgley SA. Activation of cerebellar climbing fibres to rat cerebellar posterior lobe from motor  
1051 cortical output pathways. 2001 *Journal of Physiology*; 536(3):825–839. doi: [10.1111/j.1469-7793.2001.00825.x](https://doi.org/10.1111/j.1469-7793.2001.00825.x).
- 1052 **de Barenne JGD**. "Corticalization" of function and functional localization in the cerebral cortex. 1933 *Archives*  
1053 *of Neurology And Psychiatry*; doi: [10.1001/archneurpsyc.1933.02240160196012](https://doi.org/10.1001/archneurpsyc.1933.02240160196012).
- 1054 **Barlow H**. Cerebral cortex as model builder. 1985 *Models of the visual cortex*;
- 1055 **Bernhard CG**, Bohm E. Cortical representation and functional significance of the corticomotoneuronal system.  
1056 1954 *Archives of Neurology And Psychiatry*; doi: [10.1001/archneurpsyc.1954.02330040075006](https://doi.org/10.1001/archneurpsyc.1954.02330040075006).
- 1057 **Bernstein J**. Ueber den zeitlichen Verlauf der negativen Schwankung des Nervenstroms. 1868 *Pflügers Archiv*;  
1058 1:173–207. doi: [10.1007/BF01640316](https://doi.org/10.1007/BF01640316).
- 1059 **Bernstein NA**. *Dexterity and its Development*. Latash ML, Turvey M, editors, L. Erlbaum Associates; 1996.
- 1060 **Bjursten LM**, Norrsell K, Norrsell U. Behavioural repertory of cats without cerebral cortex from infancy. 1976  
1061 *Experimental brain research*;
- 1062 **du Bois-Reymond E**. Vorläufiger Abriss einer Untersuchung über den sogenannten Froschstrom und über die  
1063 elektromotorischen Fische. 1843 *Annalen der Physik und Chemie*; 58:1–30.
- 1064 **Broca P**. Remarques sur le siège de la faculté du langage articulé; suivies d'une observation d'aphemie. 1861  
1065 *Bulletin de la société anatomique de Paris*; 6:330–357.
- 1066 **Brösamle C**, Schwab ME. Ipsilateral, ventral corticospinal tract of the adult rat: Ultrastructure, myelination and  
1067 synaptic connections. 2000 *Journal of Neurocytology*; 29:499–507. doi: [10.1023/A:1007297712821](https://doi.org/10.1023/A:1007297712821).
- 1068 **Buzsáki G**, Anastassiou CA, Koch C. The origin of extracellular fields and currents – EEG, ECoG, LFP and spikes.  
1069 2012 *Nat Rev Neurosci*; doi: [10.1038/nrn3241](https://doi.org/10.1038/nrn3241).
- 1070 **Capaday C**, Forget R, Fraser R, Lamarre Y. Evidence for a contribution of the motor cortex to the long-latency  
1071 stretch reflex of the human thumb. 1991 *J Physiol*; 440:243–255. doi: [10.1113/jphysiol.1991.sp018706](https://doi.org/10.1113/jphysiol.1991.sp018706).
- 1072 **Churchland MM**, Shenoy KV. Temporal complexity and heterogeneity of single-neuron activity in premotor and  
1073 motor cortex. 2007 *J Neurophysiol*; doi: [10.1152/jn.00095.2007](https://doi.org/10.1152/jn.00095.2007).

- 1074 **Churchland MM**, Cunningham JP, Kaufman MT, Foster JD, Nuyujukian P, Ryu SI, Shenoy KV. Neural population  
1075 dynamics during reaching. 2012 *Nature*; doi: 10.1038/nature11129.
- 1076 **Coates A**, Abbeel P, Ng AY. Learning for control from multiple demonstrations. 2008 Proceedings of the 25th  
1077 international conference on Machine learning - ICML '08; doi: 10.1145/1390156.1390175.
- 1078 **Cole J**. Three tests for the study of motor and sensory abilities in monkeys. 1952 *Journal of Comparative and*  
1079 *Physiological Psychology*; 45(3):226–230.
- 1080 **Darling WG**, Pizzimenti MA, Morecraft RJ. Functional recovery following motor cortex lesions in non-human  
1081 primates: experimental implications for human stroke patients. 2011 *Journal of Integrative Neuroscience*;  
1082 doi: 10.1142/S0219635211002737.
- 1083 **DeFeudis FV**. Physiological and behavioral studies with muscimol. 1980 *Neurochemical research*; 5(10):1047–  
1084 1068.
- 1085 **Dimitriadis G**, Fransen AMM, Maris E. Sensory and cognitive neurophysiology in rats. Part 1: Controlled tactile  
1086 stimulation and micro-ECoG recordings in freely moving animals. 2014 *Journal of Neuroscience Methods*; doi:  
1087 10.1016/j.jneumeth.2014.05.001.
- 1088 **Dong S**, Allen Ja, Farrell M, Roth BL. A chemical-genetic approach for precise spatio-temporal control of cellular  
1089 signaling. 2010 *Molecular BioSystems*; doi: 10.1039/c002568m.
- 1090 **ten Donkelaar HJ**. Evolution of Motor Systems: Corticospinal, Reticulospinal, Rubrospinal and Vestibulos-  
1091 pinal Systems. In: *Encyclopedia of Neuroscience* Berlin, Heidelberg: Springer Berlin Heidelberg; 2009. doi:  
1092 10.1007/978-3-540-29678-2\_3131.
- 1093 **Donoghue JP**, Wise SP. The motor cortex of the rat: cytoarchitecture and microstimulation mapping. 1982 *The*  
1094 *Journal of comparative neurology*; doi: 10.1002/cne.902120106.
- 1095 **Doya K**. What are the computations of the cerebellum, the basal ganglia and the cerebral cortex? 1999 *Neural*  
1096 *networks : the official journal of the International Neural Network Society*;
- 1097 **Drew T**, Jiang W, Kably B, Lavoie S. Role of the motor cortex in the control of visually triggered gait modifications.  
1098 1996 *Canadian journal of physiology and pharmacology*;
- 1099 **Drew T**, Jiang W, Widajewicz W. Contributions of the motor cortex to the control of the hindlimbs during  
1100 locomotion in the cat. 2002 *Brain research Brain research reviews*;
- 1101 **Erlich JC**, Bialek M, Brody CD. A cortical substrate for memory-guided orienting in the rat. 2011 *Neuron*; doi:  
1102 10.1016/j.neuron.2011.07.010.
- 1103 **Evarts EV**. Relation of pyramidal tract activity to force exerted during voluntary movement. 1968 *Journal of*  
1104 *neurophysiology*;
- 1105 **Eyre JA**, Miller S, Clowry GJ, Conway EA, Watts C. Functional corticospinal projections are established prenatally  
1106 in the human foetus permitting involvement in the development of spinal motor centres. 2000 *Brain : a*  
1107 *journal of neurology*; 123 ( Pt 1):51–64. doi: 10.1093/brain/123.1.51.
- 1108 **Farr TD**, Whishaw IQ. Quantitative and qualitative impairments in skilled reaching in the mouse (*Mus musculus*)  
1109 after a focal motor cortex stroke. 2002 *Stroke*; 33(7):1869–1875. doi: 10.1161/01.STR.0000020714.48349.4E.



- 1110 **Ferrier D.** Experimental Researches in Cerebral Physiology and Pathology. 1873 *Journal of anatomy and*  
1111 *physiology*; 8(Pt 1):152–5. doi: [10.1136/bmj.1.643.457](https://doi.org/10.1136/bmj.1.643.457).
- 1112 **Ferrier D, Yeo G.** A Record of Experiments on the Effects of Lesion of Different Regions of the Cerebral  
1113 Hemispheres. 1884 *Philosophical Transactions of the Royal Society of London (1776-1886)*; 175(January):479–  
1114 564.
- 1115 **Forsberg H, Grillner S, Rossignol S.** Phase dependent reflex reversal during walking in chronic spinal cats. 1975  
1116 *Brain Research*; 85(1):103–107. doi: [10.1016/0006-8993\(75\)91013-6](https://doi.org/10.1016/0006-8993(75)91013-6).
- 1117 **Fritsch G, Hitzig E.** Über die elektrische Erregbarkeit des Grosshirns. 1870 *Archiv für Anatomie, Physiologie und*  
1118 *Wissenschaftliche*; 37:300–332.
- 1119 **Galvani L.** De viribus electricitatis in motu muscularis commentarius. 1791 *De Bononiensi Scientiarum et*  
1120 *Artium Instituto atque Academia Commentarii*; 7:363–418. doi: [10.1097/00000441-195402000-00023](https://doi.org/10.1097/00000441-195402000-00023).
- 1121 **Georgopoulos AP, Schwartz A, Kettner R.** Neuronal population coding of movement direction. 1986 *Science*;  
1122 doi: [10.1126/science.3749885](https://doi.org/10.1126/science.3749885).
- 1123 **Glees P, Cole J.** Recovery of skilled motor functions after small repeated lesions in motor cortex in macaque.  
1124 1950 *J Neurophysiol*; 13(2):137–148.
- 1125 **Goltz F.** Über die Verrichtungen des Grosshirns. 1888 *Pflügers Archiv gesamte Physiologie des Menschen und*  
1126 *der Tiere*; 42:419–467.
- 1127 **Graham Brown T.** The Intrinsic Factors in the Act of Progression in the Mammal. 1911 *Proceedings of the Royal*  
1128 *Society B: Biological Sciences*; 84(572):308–319. doi: [10.1098/rspb.1911.0077](https://doi.org/10.1098/rspb.1911.0077).
- 1129 **Graham Brown T, Sherrington CS.** Note on the functions of the cortex cerebri. 1913 *Journal of Physiology*;  
1130 46(suppl):xxii.
- 1131 **Graziano MSA, Taylor CSR, Moore T.** Complex Movements Evoked by Microstimulation of Precentral Cortex.  
1132 2002 *Neuron*; 34:841–851.
- 1133 **Grillner S, Shik ML.** On the descending control of the lumbosacral spinal cord from the "mesencephalic  
1134 locomotor region". 1973 *Acta Physiol Scand*; 87(0001-6772):320–333.
- 1135 **Gross CG.** The discovery of motor cortex and its background. 2007 *Journal of the history of the neurosciences*;  
1136 16(3):320–31. doi: [10.1080/09647040600630160](https://doi.org/10.1080/09647040600630160).
- 1137 **Grünbaum ASF, Sherrington CS.** Observations on the Physiology of the Cerebral Cortex of the Anthropoid Apes.  
1138 1903 *Proceedings of the Royal Society of London*; 72(477-486):152–155. doi: [10.1098/rspl.1903.0033](https://doi.org/10.1098/rspl.1903.0033).
- 1139 **Guo JZ, Graves AR, Guo WW, Zheng J, Lee A, Rodríguez-González J, Li N, Macklin JJ, Phillips JW, Mensh BD,**  
1140 **Branson K, Hantman AW.** Cortex commands the performance of skilled movement. 2015 *eLife*; doi:  
1141 [10.7554/eLife.10774](https://doi.org/10.7554/eLife.10774).
- 1142 **Heffner RS, Masterton RB.** The role of the corticospinal tract in the evolution of human digital dexterity. 1983  
1143 *Brain, behavior and evolution*; 23:165–183.
- 1144 **Hill DN, Curtis JC, Moore JD, Kleinfeld D.** Primary motor cortex reports efferent control of vibrissa motion on  
1145 multiple timescales. 2011 *Neuron*; doi: [10.1016/j.neuron.2011.09.020](https://doi.org/10.1016/j.neuron.2011.09.020).

- 1146 **von Hofsten C.** Mastering Reaching and Grasping: The Development of Manual Skills in Infancy. 1989 *Advances*  
1147 *in Psychology*; 61(C):223–258. doi: 10.1016/S0166-4115(08)60023-0.
- 1148 **Hyland B.** Neural activity related to reaching and grasping in rostral and caudal regions of rat motor cortex.  
1149 1998 *Behavioural Brain Research*; 94(2):255–269. doi: 10.1016/S0166-4328(97)00157-5.
- 1150 **Jackson JH.** A study of convulsions. 1870 *Transactions of the Saint Andrews Medical Graduates Association*;  
1151 3:162–204. doi: 10.1001/archneur.1970.00480200090012.
- 1152 **Jacobs JV.** Why we need to better understand the cortical neurophysiology of impaired postural responses with  
1153 age, disease, or injury. 2014 *Frontiers in integrative neuroscience*; 8(August):69. doi: 10.3389/fnint.2014.00069.
- 1154 **James W.** Localization of functions in the brain. 1885 *Science*; doi: 10.1126/science.ns-6.143.379.
- 1155 **Jarratt H, Hyland B.** Neuronal activity in rat red nucleus during forelimb reach-to-grasp movements. 1999  
1156 *Neuroscience*; 88(2):629–642. doi: 10.1016/S0306-4522(98)00227-9.
- 1157 **Kawai R, Markman T, Poddar R, Ko R, Fantana A, Dhawale A, Kampff A, Ölveczky B.** Motor Cortex Is Required for  
1158 Learning but Not for Executing a Motor Skill. 2015 *Neuron*; doi: 10.1016/j.neuron.2015.03.024.
- 1159 **Kumar S, Hedges S.** A molecular timescale for vertebrate evolution. 1998 *Nature*; 392:917–920.
- 1160 **Kuypers HGJM.** Anatomy of the descending pathways. 1981 *Comprehensive Physiology*; p. 597–666.
- 1161 **Kwakkel G, Kollen BJ, van der Grond J, Prevo AJH.** Probability of Regaining Dexterity in the Flaccid Upper Limb:  
1162 Impact of Severity of Paresis and Time Since Onset in Acute Stroke. 2003 *Stroke*; 34(9):2181–2186. doi:  
1163 10.1161/01.STR.0000087172.16305.CD.
- 1164 **Lacroix S, Havton La, McKay H, Yang H, Brant A, Roberts J, Tuszynski MH.** Bilateral corticospinal projections  
1165 arise from each motor cortex in the macaque monkey: a quantitative study. 2004 *The Journal of comparative*  
1166 *neurology*; 473(2):147–161. doi: 10.1002/cne.20051.
- 1167 **Langley JN, Sherrington CS.** Secondary Degeneration of Nerve Tracts following removal of the Cortex of the  
1168 Cerebrum in the Dog. 1884 *Journal of Physiology*; 5(2):49–65. doi: 10.1113/jphysiol.1884.sp000151.
- 1169 **Laplante D, Talairach J, Meininger V, Bancaud J, Bouchareine A.** Motor consequences of motor area ablations in  
1170 man. 1977 *Journal of the Neurological Sciences*; doi: 10.1016/0022-510X(77)90004-1.
- 1171 **Lashley KS.** Studies of cerebral function in learning. III. The motor areas. 1921 *Brain*; 44:255–285. doi:  
1172 10.1037/h0070668.
- 1173 **Lashley KS.** Studies of cerebral function in learning: V. The retention of motor habits after destruction of  
1174 the so-called motor areas in primates. 1924 *Archives of Neurology and Psychiatry*; 12(3):249–276. doi:  
1175 10.1001/archneurpsyc.1924.02200030002001.
- 1176 **Lashley KS.** Integrative functions of the cerebral cortex. 1933 *Physiological Reviews*; 13:1–43.
- 1177 **Lashley KS.** In search of the engram. 1950 *Symposia of the Society for Experimental Biology*; .
- 1178 **Lawrence DG, Hopkins DA.** The development of motor control in the rhesus monkey: evidence concerning the  
1179 role of corticomotoneuronal connections. 1976 *Brain : a journal of neurology*; doi: 10.1093/brain/99.2.235.
- 1180 **Lawrence DG, Kuypers HGJM.** The functional organization of the motor system in the monkey. I. The effects of  
1181 bilateral pyramidal lesions. 1968 *Brain*; 91(1):1–14.

- 1182 **Lawrence DG**, Kuypers HGJM. The functional organization of the motor system in the monkey. II. The effects of  
1183 lesions of the descending brain-stem pathways. 1968 *Brain*; 91(1):15–36.
- 1184 **Lee S**, Carvell GE, Simons DJ. Motor modulation of afferent somatosensory circuits. 2008 *Nature neuroscience*;  
1185 doi: [10.1038/nn.2227](https://doi.org/10.1038/nn.2227).
- 1186 **Leyton ASF**, Sherrington CS. Observations on the excitable cortex of the chimpanzee, orang-utan, and gorilla.  
1187 1917 *Experimental Physiology*; 11(2):135–222. doi: [10.1113/expphysiol.1917.sp000240](https://doi.org/10.1113/expphysiol.1917.sp000240).
- 1188 **Liddell E**, Phillips C. Pyramidal section in the cat. 1944 *Brain*;
- 1189 **Lopes G**, Bonacchi N, Frazão J, Neto J, Atallah B, Soares S, Moreira L, Matias S, Itskov P, Correia P, Medina R,  
1190 Calcaterra L, Dreosti E, Paton J, Kampff A. Bonsai: An event-based framework for processing and controlling  
1191 data streams. 2015 *Frontiers in Neuroinformatics*; doi: [10.3389/fninf.2015.00007](https://doi.org/10.3389/fninf.2015.00007).
- 1192 **Louis ED**. Contralateral control: Evolving concepts of the brain-body relationship from Hippocrates to Morgagni.  
1193 1994 *Neurology*; 44(12):2398–2400.
- 1194 **Marple-Horvat DE**, Amos A, Armstrong DM, J M C. Changes in the discharge patterns of cat motor cortex  
1195 neurones during unexpected perturbations of on-going locomotion. 1993 *Journal of Physiology*;
- 1196 **Matthews PB**, Farmer SF, Ingram DA. On the localization of the stretch reflex of intrinsic hand muscles in a  
1197 patient with mirror movements. 1990 *The Journal of Physiology*; doi: [10.1113/jphysiol.1990.sp018228](https://doi.org/10.1113/jphysiol.1990.sp018228).
- 1198 **McKinney W**. Data Structures for Statistical Computing in Python. 2010 *Proceedings of the 9th Python in  
1199 Science Conference*;
- 1200 **Metz GA**, Whishaw IQ. Cortical and subcortical lesions impair skilled walking in the ladder rung walking test: a  
1201 new task to evaluate fore- and hindlimb stepping, placing, and co-ordination. 2002 *Journal of neuroscience  
1202 methods*;
- 1203 **Meyer PM**, Meyer DR. Neurosurgical procedures with special reference to aspiration lesions. In: Myers RD,  
1204 editor. *Methods in Psychobiology, Vol. 1* London: Academic Press; 1971.p. 91–130.
- 1205 **van Middendorp JJ**, Sanchez GM, Burridge AL. The Edwin Smith papyrus: a clinical reappraisal of the oldest  
1206 known document on spinal injuries. 2010 *European spine journal : official publication of the European Spine  
1207 Society, the European Spinal Deformity Society, and the European Section of the Cervical Spine Research  
1208 Society*; 19(11):1815–23. doi: [10.1007/s00586-010-1523-6](https://doi.org/10.1007/s00586-010-1523-6).
- 1209 **Miller MW**. The origin of corticospinal projection neurons in rat. 1987 *Exp Brain Res*; 67(2):339–351. doi:  
1210 [10.1007/BF00248554](https://doi.org/10.1007/BF00248554).
- 1211 **Nathan PW**, Smith MC. Long descending tracts in man. I. Review of present knowledge. 1955 *Brain*; doi:  
1212 [10.1093/brain/78.2.248](https://doi.org/10.1093/brain/78.2.248).
- 1213 **Nathan PW**, Smith MC. The rubrospinal and central tegmental tracts in man. 1982 *Brain*; doi:  
1214 [10.1093/brain/105.2.223](https://doi.org/10.1093/brain/105.2.223).
- 1215 **Neafsey E**, Bold E, Haas G, Hurley-Gius K, Quirk G, Sievert C, Terreberry R. The organization of the rat motor  
1216 cortex: a microstimulation mapping study. 1986 *Brain Research Reviews*;
- 1217 **Oakley Da**. Learning with food reward and shock avoidance in neocorticate rats. 1979 *Experimental  
1218 neurology*;

- 1219 **Otchy TM**, Wolff SBE, Rhee JY, Pehlevan C, Kawai R, Kempf A, Gobes SMH, Ölviczky BP. Acute off-target effects  
1220 of neural circuit manipulations. 2015 *Nature*; doi: 10.1038/nature16442.
- 1221 **Papert S**. The summer vision project; 1966.
- 1222 **Penfield W**, Boldrey E. Somatic motor and sensory representation in the cerebral cortex of man as studied by  
1223 electrical stimulation. 1937 *Brain*; 60(4):389–443.
- 1224 **Petreaanu L**, Gutnisky Da, Huber D, Xu NI, O'Connor DH, Tian L, Looger L, Svoboda K. Activity in motor–sensory  
1225 projections reveals distributed coding in somatosensation. 2012 *Nature*; doi: 10.1038/nature11321.
- 1226 **Phillips CG**. The Ferrier Lecture, 1968: Motor Apparatus of the Baboon's Hand. 1969 *Proceedings of the Royal*  
1227 *Society B: Biological Sciences*; doi: 10.1098/rspb.1969.0044.
- 1228 **Phillips CG**, Zeki S, Barlow HB. Localization of function in the cerebral cortex: past, present and future. 1984  
1229 *Brain*; doi: 10.1093/brain/107.1.328.
- 1230 **Porro CA**, Francescato MP, Cettolo V, Diamond ME, Baraldi P, Zuiani C, Bazzocchi M, di Prampero PE. Primary  
1231 motor and sensory cortex activation during motor performance and motor imagery: a functional magnetic re-  
1232 sonance imaging study. 1996 *The Journal of neuroscience : the official journal of the Society for Neuroscience*;  
1233 16(23):7688–7698.
- 1234 **Rizzolatti G**, Craighero L. The Mirror-Neuron System. 2004 *Annual Review of Neuroscience*; doi: 10.1146/annu-  
1235 *rev.neuro.27.070203.144230*.
- 1236 **Schindelin J**, Arganda-Carreras I, Frise E, Kaynig V, Longair M, Pietzsch T, Preibisch S, Rueden C, Saalfeld S,  
1237 Schmid B, Tinevez JY, White DJ, Hartenstein V, Eliceiri K, Tomancak P, Cardona A. Fiji: an open-source platform  
1238 for biological-image analysis. 2012 *Nature methods*; 9(7):676–82. doi: 10.1038/nmeth.2019.
- 1239 **Schneider DM**, Nelson A, Mooney R. A synaptic and circuit basis for corollary discharge in the auditory cortex.  
1240 2014 *Nature*; doi: 10.1038/nature13724.
- 1241 **Schuetze SM**. The discovery of the action potential. 1983 *Trends in Neurosciences*; 6:164–168. doi:  
1242 10.1016/0166-2236(83)90078-4.
- 1243 **Schwarcz R**, Hökfelt T, Fuxe K, Jonsson G, Goldstein M, Terenius L. Ibotenic acid-induced neuronal degeneration:  
1244 A morphological and neurochemical study. 1979 *Experimental Brain Research*; doi: 10.1007/BF00237708.
- 1245 **Schwartz AB**. Motor cortical activity during drawing movements: population representation during sinusoid  
1246 tracing. 1993 *Journal of neurophysiology*; 70(1):28–36.
- 1247 **Scott SH**, Gribble PL, Graham KM, Cabel W. Dissociation between hand motion and population vectors from  
1248 neural activity in motor cortex. 2001 *Nature*;
- 1249 **Senoo T**, Yamakawa Y, Mizusawa S, Namiki A, Ishikawa M, Shimojo M. Skillful manipulation based on high-speed  
1250 sensory-motor fusion. 2009 2009 *IEEE International Conference on Robotics and Automation*; p. 1611–1612.  
1251 doi: 10.1109/ROBOT.2009.5152852.
- 1252 **Sherrington CS**. On Secondary and Tertiary Degenerations in the Spinal Cord of the Dog. 1885 *Journal of*  
1253 *Physiology*; 6(4):177–191. doi: 10.1113/jphysiol.1885.sp000195.
- 1254 **Sherrington CS**. Note on the Knee-jerk and the Correlation of Action of Antagonistic Muscles. 1893 *Proceedings*  
1255 *of the Royal Society of London*; 52(315-320):556–564.

- 1256 **Sherrington CS.** The Integrative Action of the Nervous System. Yale University Press; 1906. doi:  
1257 10.1097/00005053-190734120-00021.
- 1258 **Sherrington CS.** Flexion-reflex of the limb, crossed extension-reflex, and reflex stepping and standing. 1910  
1259 The Journal of physiology; 40(1-2):28–121. doi: [10.1113/jphysiol.1910.sp001362](https://doi.org/10.1113/jphysiol.1910.sp001362).
- 1260 **Spinka M, Newberry RC, Bekoff M.** Mammalian Play: Training for the Unexpected. 2001 Source: The Quarterly  
1261 Review of Biology; doi: 10.1086/393866.
- 1262 **Terry P, Herbert BA, Oakley DA.** Anomalous patterns of response learning and transfer in decorticate rats. 1989  
1263 Behavioural brain research; 33(1):105–9.
- 1264 **Thelen E.** Developmental origins of motor coordination: leg movements in human infants. 1985 Developmental  
1265 psychobiology; doi: [10.1002/dev.420180102](https://doi.org/10.1002/dev.420180102).
- 1266 **Todorov E.** Direct cortical control of muscle activation in voluntary arm movements: a model. 2000 Nature  
1267 neuroscience; doi: 10.1038/73964.
- 1268 **Tower S.** Pyramidal lesion in the monkey. 1940 Brain; 63(1):36–90.
- 1269 **Travis AM.** Neurological deficiencies after ablation of the precentral motor area in Macaca mulatta. 1955 Brain;  
1270 78(2):155–173.
- 1271 **Turner RS, DeLong MR.** Corticostriatal activity in primary motor cortex of the macaque. 2000 The Journal of  
1272 neuroscience : the official journal of the Society for Neuroscience; 20(18):7096–7108.
- 1273 **Tyler KL, Malessa R.** The Goltz-Ferrier debates and the triumph of cerebral localizationalist theory. 2000  
1274 Neurology; 55:1015–1024. doi: [10.1212/WNL.56.10.1424](https://doi.org/10.1212/WNL.56.10.1424).
- 1275 **Waller A.** Experiments on the Section of the glossopharyngeal and hypoglossal nerves of the frog, and  
1276 observations of the alterations produced thereby in the structure of their primitive fibres. 1850 Philosophical  
1277 transactions of the Royal Society of London; 140(1850):423–429. doi: [10.1016/j.expneurol.2012.01.011](https://doi.org/10.1016/j.expneurol.2012.01.011).
- 1278 **van der Walt S, Colbert SC, Varoquaux G.** The NumPy Array: A Structure for Efficient Numerical Computation.  
1279 2011 Computing in Science & Engineering; 13(2):22–30. doi: [10.1109/MCSE.2011.37](https://doi.org/10.1109/MCSE.2011.37).
- 1280 **Watson BD, Dietrich WD, Busto R, Wachtel MS, Ginsberg MD.** Induction of reproducible brain infarction by  
1281 photochemically initiated thrombosis. 1985 Annals of Neurology; 17(5):497–504. doi: [10.1002/ana.410170513](https://doi.org/10.1002/ana.410170513).
- 1282 **Whishaw IQ, Pellis SM, Gorny BP, Pellis VC.** The impairments in reaching and the movements of compensation  
1283 in rats with motor cortex lesions: an endpoint, videorecording, and movement notation analysis. 1991  
1284 Behavioural brain research;
- 1285 **Whishaw IQ.** Loss of the innate cortical engram for action patterns used in skilled reaching and the development  
1286 of behavioral compensation following motor cortex lesions in the rat. 2000 Neuropharmacology; doi:  
1287 10.1016/S0028-3908(99)00259-2.
- 1288 **Woolsey CN, Gorska T, Wetzell A, Erickson TC, Earls FJ, Allman JM.** Complete unilateral section of the pyramidal  
1289 tract at the medullar level in Macaca mulatta. 1972 Brain Research;
- 1290 **Wu JH, Corwin JV, Reep RL.** Organization of the corticostriatal projection from rat medial agranular cortex to far  
1291 dorsolateral striatum. 2009 Brain Research; doi: [10.1016/j.brainres.2009.05.044](https://doi.org/10.1016/j.brainres.2009.05.044).

1292 **Yang HW**, Lemon RN. An electron microscopic examination of the corticospinal projection to the cervical spinal  
1293 cord in the rat: lack of evidence for cortico-motoneuronal synapses. 2003 *Experimental brain research*;  
1294 149(4):458–69. doi: 10.1007/s00221-003-1393-9.

1295 **Zaaimi B**, Edgley SA, Soteropoulos DS, Baker SN. Changes in descending motor pathway connectivity after  
1296 corticospinal tract lesion in macaque monkey. 2012 *Brain*; 135(7):2277–2289. doi: 10.1093/brain/aws115.
